1 **Cortical VIP neurons locally control the gain but globally control the coherence of gamma band rhythms**

2 Julia Veit<sup>1\*\*</sup>, Gregory Handy<sup>2,3</sup>, Daniel P. Moxing<sup>1,4</sup>, Brent Doiron<sup>2,3</sup>, Hillel Adesnik<sup>1,5†</sup>

3 <sup>1</sup>Department of Molecular and Cell Biology, University of California, Berkeley

4 <sup>2</sup>Departments of Neurobiology and Statistics, University of Chicago

5 <sup>3</sup>Grossman Center for Quantitative Biology and Human Behavior, University of Chicago

6 <sup>4</sup>Biophysics Graduate Program, University of California, Berkeley

7 <sup>5</sup>The Helen Wills Neuroscience Institute, University of California, Berkeley

8 \*Present address: Department of Physiology, University of Freiburg, Freiburg, Germany

9 †Corresponding authors: [julia.veit@physiologie.uni-freiburg.de](mailto:julia.veit@physiologie.uni-freiburg.de), [hadesnik@berkeley.edu](mailto:hadesnik@berkeley.edu)

10

11 **Abstract**

12 Gamma band synchronization can facilitate local and long-range communication in neural circuits. In the  
13 primary visual cortex (V1) the strength of synchronization on the local level is strongly tuned to the  
14 contrast, size and center/surround orientation of grating stimuli. On the global level, the synchronization  
15 of gamma oscillations across the retinotopic map crucially depends on matched stimulus properties in the  
16 corresponding locations in the visual field. Although these features of V1 gamma rhythms are likely to be  
17 crucial for how they might support cortico-cortical communication and visual perception, their neural  
18 basis remains largely unknown. We hypothesized VIP disinhibitory interneurons, which shape other tuning  
19 properties in V1 by inhibiting SST neurons, may be responsible for tuning local gamma band power and  
20 global gamma synchronization. To test these ideas, we combined multi-electrode electrophysiology, cell-  
21 type specific optogenetic suppression of VIP neurons and computational modeling. Contrary to  
22 expectations, our data show that on the local level, VIP activity has no role in tuning gamma power to  
23 stimulus properties; rather, it scales the gain of gamma oscillations linearly across stimulus space and  
24 across behavioral state. Conversely, on the global level, VIP neurons specifically suppress gamma  
25 synchronization (as measured by spectral coherence) between spatially separated cortical ensembles  
26 when they are processing non-matched stimulus features. A straightforward computational model of V1  
27 shows that like-to-like connectivity across retinotopic space, and specific, but powerful VIP→SST  
28 inhibition are sufficient to capture these seemingly opposed effects. These data demonstrate how VIP  
29 neurons differentially impact local and global properties of gamma rhythms depending on the global  
30 statistics of the retinal image. VIP neurons may thus construct temporal filters in the gamma band for  
31 spatially continuous image features, such as contours, to facilitate the downstream generation of  
32 coherent visual percepts.

33 **Introduction**

34 Synchronized activity is widespread in neural systems, occurring both spontaneously and during sensory  
35 stimulation, cognition, and motor action (Jasper & Penfield, 1949; Adrian, 1950; Bressler & Freeman,  
36 1980; Riehle *et al.*, 1997; Buzsáki & Draguhn, 2004; Colgin *et al.*, 2009; Fries, 2009; Vinck *et al.*, 2015). In  
37 monkeys, synchronization is dependent on stimulus features (Gieselmann & Thiele, 2008; Ray & Maunsell,  
38 2010; Ray *et al.*, 2013) and modulated by behavioral state, such as directed attention (Fries *et al.*, 2001;  
39 Womelsdorf & Fries, 2006; Chalk *et al.*, 2010; Vinck *et al.*, 2013). Synchronization may facilitate neural  
40 communication by enhancing the temporal co-incidence of synaptic excitatory potentials in target  
41 neurons (Colgin *et al.*, 2009; Fries, 2015). Gamma band synchrony across distant sites in the primary visual  
42 cortex (V1) depends on matched stimulus properties processed by the two sites (Gray & Singer, 1989;  
43 Fries, 2009), suggesting a role in promoting the contextual synthesis of visual percepts downstream. Thus,  
44 the tuning of local gamma band power and global gamma band coherence to specific stimuli and contexts  
45 may be crucial for its role in cortical computation and perception. Importantly, not only must gamma

46 rhythms be tuned, they must also be scaled appropriately, as excessive synchrony can limit information  
47 carrying capacity of neural networks (Benda *et al.*, 2006; Nandy *et al.*, 2019), and too much or too little  
48 synchrony may lead to neurological disorders (Lewis *et al.*, 2005; Schnitzler & Gross, 2005; Uhlhaas &  
49 Singer, 2010; Yizhar *et al.*, 2011). Remarkably, despite detailed knowledge of the phenomenology of  
50 cortical oscillations on one hand, and a deep mechanistic and theoretical insight into their underlying  
51 synaptic basis on the other (Traub *et al.*, 2004; Bartos *et al.*, 2007; Buzsáki & Wang, 2012) we have a very  
52 limited understanding for the neural circuits that regulate their magnitude and coherence across different  
53 sensory and behavioral contexts (Fries *et al.*, 2001; Chalk *et al.*, 2010).

54 Mechanistically, ample evidence indicates that local GABAergic interneurons temporally entrain  
55 excitatory neurons by biasing their spike timing to the trough of their periodic inhibitory synaptic  
56 potentials (Bartos *et al.*, 2002, 2007; Hasenstaub *et al.*, 2005, 2016; Tukker *et al.*, 2007; Wulff *et al.*, 2009;  
57 Buzsáki & Wang, 2012; Perrenoud *et al.*, 2016; Zhang *et al.*, 2018). This periodicity results from the  
58 recurrent interaction between excitatory and inhibitory neurons (Hasenstaub *et al.*, 2005), through direct  
59 interneuron-to-interneuron synaptic coupling (Sohal & Huguenard, 2005), and through electrical synapses  
60 (Traub *et al.*, 2001; Long *et al.*, 2005; Neske & Connors, 2016). Cortical gamma oscillations depend on  
61 various types of interneurons, including soma-targeting parvalbumin positive basket cells (Cardin *et al.*,  
62 2009; Sohal *et al.*, 2009). In the mouse primary visual cortex, a visually induced gamma oscillation (25-40  
63 Hz), similar to the widely studied gamma rhythms in higher mammals (Gray *et al.*, 1989; Gieselmann &  
64 Thiele, 2008; Ray & Maunsell, 2010; Self *et al.*, 2016), requires the activity of somatostatin (SST)  
65 interneurons (Chen *et al.*, 2017; Veit *et al.*, 2017; Hakim *et al.*, 2018). In V1, SST neuron firing rates strongly  
66 correlate with visually induced narrow-band gamma power on a trial-to-trial basis, and optogenetic  
67 inactivation of SST neurons (but not PV neurons) nearly abolishes visually evoked gamma oscillations (Veit  
68 *et al.*, 2017). SST neurons are also known to be critical for the encoding of contextual stimuli, such as for  
69 gratings that extend beyond neurons' classical receptive fields (Adesnik *et al.*, 2012; Nienborg *et al.*, 2013;  
70 Keller *et al.*, 2020; Mossing *et al.*, 2021). Notably, a second narrowband gamma oscillation around ~60 Hz  
71 that is increased by locomotion and luminance, but strongly suppressed by visual stimuli, is also present  
72 in V1 but is not of cortical origin and thus independent of cortical interneurons (Saleem *et al.*, 2017; Storchi  
73 *et al.*, 2017; Veit *et al.*, 2017; Hoseini *et al.*, 2021).

74 The discovery that VIP interneurons preferentially inhibit other interneurons, especially SST neurons,  
75 (Pfeffer *et al.*, 2013; Pi *et al.*, 2013; Karnani, Jackson, Ayzenshtat, Hamzehei Sichani, *et al.*, 2016) raises  
76 the hypothesis that they might regulate the power and stimulus-dependence of gamma band oscillations.  
77 Recent work has shown that VIP neurons are suppressed by visual stimuli (Keller *et al.*, 2020; Millman *et al.*,  
78 *et al.*, 2020; Mossing *et al.*, 2021) that have previously been shown to drive strong gamma oscillations  
79 (Gieselmann & Thiele, 2008; Ray *et al.*, 2013; Veit *et al.*, 2017), but no direct link has been established. In  
80 particular, large, high contrast and iso-oriented gratings potently drive gamma rhythms in V1, but  
81 simultaneously suppress VIP activity. Conversely, small, low contrast, cross-oriented gratings weakly induce  
82 gamma rhythms, but drive strong VIP firing. These results raise the hypothesis that while SST neurons  
83 induce gamma rhythms by inhibiting pyramidal cells, VIP neurons tune the gamma rhythm to specific  
84 stimulus features by modulating SST neurons. If so, this would establish VIP-mediated disinhibition as a  
85 crucial regulator of local gamma band synchronization.

86 In this study we test whether VIP neurons play a role in tuning gamma power and synchrony globally  
87 across the retinotopic map (hereafter termed global coherence) via their disinhibitory action in the  
88 cortical microcircuit. Specifically, if VIP neurons suppress SST neurons they would reduce local gamma  
89 power and this may also serve to reduce global coherence. However, the efficacy with which VIP neuron  
90 activity suppresses global coherence may depend upon whether the stimulus features in distant sites

91 conflict or match with one another. To test this idea we combined multi-site, multi electrode array  
92 recordings and optogenetics in awake mice with computational modeling of the superficial layers of the  
93 V1 network. We found that VIP suppression only scaled the gain of local gamma band synchronization,  
94 but did not alter its tuning, contrary to expectations. Conversely, we found that VIP suppression enhanced  
95 the global coherence between distant sites in V1 preferentially when those sites were processing non-  
96 matched stimulus features. Remarkably, VIP activity could simultaneously suppress gamma power locally  
97 but selectively permit gamma coherence globally for large, homogenous textures. This demonstrates a  
98 stimulus-dependent decoupling between the local and global properties of gamma oscillations. A  
99 computational model of L2/3 in mouse V1 captures all of these findings with only the minimal conditions  
100 of like-to-like connectivity across space and selective inhibition of SST by VIP. The ubiquity of these  
101 features throughout cortex suggest that our findings may generalize beyond the visual system.

102 These results reveal contrasting local and global circuit roles of VIP-mediated disinhibition in the visual  
103 cortex. They demonstrate that locally, VIP activity regulates the gain, but not the tuning of gamma power,  
104 while globally VIP neurons contribute to feature-dependent network synchroniation. These widespread  
105 effects of VIP neuron suppression might help explain why perturbation of VIP neurons – whether it be  
106 genetically, pharmacologically, or optogenetically – potently impairs visual behaviors and learning.  
107 Furthermore, they raise the notion that developmental defects in VIP neurons might lead to a range of  
108 neurological disorders that have been linked to changes in cortical rhythms, potentially through  
109 maladaptive hyper-synchronization.

## 110 Results

### 111 VIP neurons locally control the gain but not the tuning of visually induced gamma oscillations in V1

112 In primates, cats, and humans, visual stimuli can induce potent oscillations in the gamma band (20-90 Hz),  
113 yet the strength of these rhythms depends on the properties of the visual stimulus (Gray *et al.*, 1989;  
114 Gieselmann & Thiele, 2008; Ray & Maunsell, 2010; Hermes *et al.*, 2015; Self *et al.*, 2016; Bartoli *et al.*,  
115 2019; Peter *et al.*, 2019) and the brain state (Chalk *et al.*, 2010; Bosman *et al.*, 2012). To probe the neural  
116 mechanisms of gamma rhythms in mouse primary visual cortex (V1), we presented head-fixed, awake,  
117 locomoting mice with drifting gratings varying in size, contrast, or the orientation of the grating surround  
118 relative to the center. We inserted one or two laminar multielectrode arrays into the superficial layers of  
119 the primary visual cortex to record both isolated single units and the local field potential (LFP) and used  
120 optogenetic perturbations to probe the underlying circuit mechanisms (Fig. 1A). Visual stimuli potently  
121 and specifically induced narrow band gamma oscillations (~30 Hz), and gamma power rose monotonically  
122 with stimulus contrast and size, (Fig 1 B,C; Fig. S1 A-C), but decreased as the relative angle of orientation  
123 between the center and surround was increased (Fig 1 D; Fig. S1 D). These effects in the LFP were mirrored  
124 by those in the phase-locking of isolated single units (Fig. S2) confirming that they were mediated by local  
125 changes in spike synchrony. Gamma power across these stimulus dimensions was also strongly modulated  
126 by behavioral state (Fig. S3).

127 For three reasons, we hypothesized that cortical VIP neurons might be crucial for the strong feature and  
128 behavioral dependence of visually induced gamma rhythms. First, VIP neurons potently inhibit SST  
129 neurons (Pfeffer *et al.*, 2013) and SST activity has been shown to be critical for visually driven gamma  
130 oscillations in V1 (Veit *et al.*, 2017). Second, VIP neurons control cortical gain across behavioral states (Lee  
131 *et al.*, 2013; Fu *et al.*, 2014; Jackson *et al.*, 2016) similar to what we observed for gamma power. Third,  
132 across visual stimuli, VIP neurons' activity has been reported to be lowest when we find gamma power to  
133 be the highest: VIP neurons are suppressed by high contrast, suppressed by large gratings, and suppressed  
134 by iso-oriented as compared to cross-oriented gratings (Keller *et al.*, 2020; Millman *et al.*, 2020; Mossing  
135 *et al.*, 2021). To probe this last notion directly, we correlated gamma power measured

136 electrophysiologically to average SST and VIP neuron activity measured with two-photon imaging in a  
 137 separate set of mice. While SST neuron activity was highest in conditions that showed high gamma power  
 138 (R: 0.76, p: 0.019), VIP neuron activity was lowest (R: -0.84, p: 0.005) and vice versa (Fig. S4).

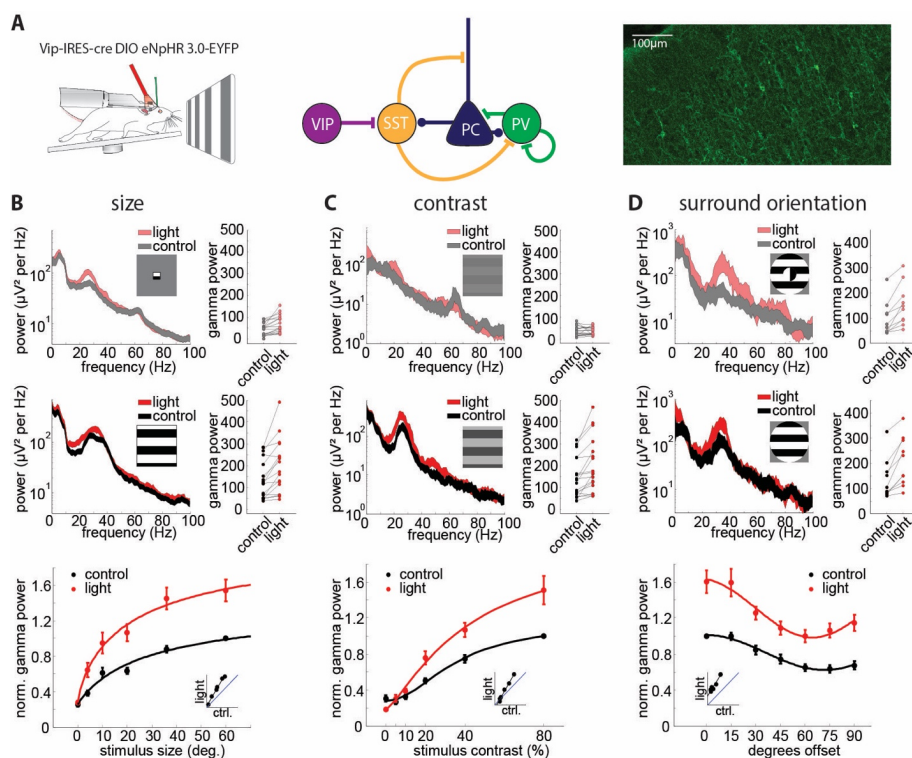

**Figure 1: VIP neurons locally control the gain but not the tuning of visually induced gamma oscillations.** **A:** Left: Schematic of a head-fixed mouse on a running wheel with an optic fiber over the visual cortex and a laminar multi-electrode array in V1. Middle: Simplified circuit diagram with VIP neurons disinhibiting PCs from SST inhibition. Right: Example image of a V1 brain section from a VIP-Cre mouse injected with a Cre-dependent AAV virus driving eNpHR3.0-YFP. **B:** Top: Left: example LFP power spectrum in response to a small ( $4^\circ$ ) drifting grating with (red hue) and without (gray) light mediated suppression of VIP neurons (thickness of line denotes mean  $\pm$  standard error). Right: plot comparing the gamma power to small gratings with and without light ( $n = 17$ ,  $p = 0.0003$ , Wilcoxon signed rank test). Middle: Left: example LFP power spectrum in response to a large ( $60^\circ$ ) drifting grating with (red) and without (black) light mediated suppression of VIP neurons (thickness of line denotes mean  $\pm$  standard error). Right: plot comparing the gamma power to large gratings with and without light ( $n = 17$ ,  $p = 0.0008$ , Wilcoxon signed rank test). Bottom: Average normalized gamma power with (red) and without (black) optogenetic suppression of VIP neurons versus stimulus size ( $n = 17$ , 2-way-ANOVA: main effect of light:  $F(1,160) = 54.18$ ,  $p < 0.001$ ; main effect of size:  $F(4,160) = 22.18$ ,  $p < 0.001$ ; interaction:  $F(4,160) = 1.03$ ,  $p = 0.39$ ). **C:** Top: Left: example LFP power spectrum in response to a low contrast (5%) drifting grating with (red hue) and without (gray) light-mediated suppression of VIP neurons (thickness of line denotes mean  $\pm$  standard error). Right: plot comparing the gamma power to low contrast gratings with and without light ( $n = 18$ ,  $p = 0.45$ , Wilcoxon signed rank test). Middle: Left: example LFP power spectrum in response to a high contrast (80%) drifting grating with (red) and without (black) light-mediated suppression of VIP neurons (thickness of line denotes mean  $\pm$  standard error). Right: plot comparing the gamma power to high contrast gratings with and without light ( $n = 18$ ,  $p = 0.0005$ , Wilcoxon signed rank test). Bottom: average normalized gamma power with (red) and without (black) optogenetic suppression of VIP neurons versus stimulus contrast ( $n = 18$ , 2-way-ANOVA: main effect of light:  $F(1,170) = 27.81$ ,  $p < 0.001$ ; main effect of contrast:  $F(4,170) = 65.08$ ,  $p < 0.001$ ; interaction:  $F(4,170) = 3.85$ ,  $p = 0.005$ ). **D:** Top: Left: example LFP power spectrum in response to a cross surround ( $90^\circ$  offset) drifting grating with (red hue) and without (gray) light mediated suppression of VIP neurons (thickness of line denotes mean  $\pm$  standard error). Right: plot comparing the gamma power to cross surround gratings with and without light ( $n = 10$ ,  $p = 0.002$ , Wilcoxon signed rank test). Middle: Left: example LFP power spectrum in response to an iso surround ( $0^\circ$  offset) drifting grating with (red) and without (black) light mediated suppression of VIP neurons (thickness of line denotes mean  $\pm$  standard error). Right: plot comparing the gamma power to iso surround gratings with and without light ( $n = 10$ ,  $p = 0.002$ , Wilcoxon signed rank test). Bottom: Average normalized gamma power with (red) and without (black) optogenetic suppression of VIP neurons versus relative surround orientation ( $n = 10$ , 2-way-ANOVA: main effect of light:  $F(1,125) = 119.37$ ,  $p < 0.001$ ; main effect of orientation:  $F(6,125) = 13.14$ ,  $p < 0.001$ ; interaction:  $F(6,125) = 0.88$ ,  $p = 0.51$ ).

139 These results raise the hypothesis that VIP neurons might actively tune gamma power to the contrast, size  
140 and surround orientation of gratings. If so, this would be in line with recent reports that argue that VIP  
141 neurons actively tune the firing rates of pyramidal cells across contrast (Millman *et al.*, 2020) and  
142 center/surround orientation (Keller *et al.*, 2020). To test this notion, we optogenetically suppressed VIP  
143 neurons via Cre-dependent expression of the potent optogenetic silencer eNpHR3.0. Post-mortem  
144 histological analysis revealed widespread expression of eNpHR3.0 in superficial interneurons with bipolar  
145 morphology (Figure 1A, right). Illumination of the visual cortex in these mice resulted in significant  
146 enhancements in narrowband gamma power (20-40 Hz) across visual stimulus size, contrast, and  
147 center/surround orientation (Figure 1B-D). Strikingly, VIP neuron suppression multiplicatively enhanced  
148 gamma power across all feature dimensions, thereby scaling the gain of neural synchronization while  
149 preserving the tuning to contrast, size and center/surround orientation dependence (Fig. 1B-D bottom).  
150 Thus, contrary to expectations based on these prior studies, our results negate the hypothesis that VIP  
151 activity generates the strong feature-dependence of gamma band synchronization in V1. These effects in  
152 the LFP were mirrored by changes in the phase locking of isolated single unit spiking activity (Fig. S5,6).

153 Optogenetically suppressing VIP neurons had no effect on the higher frequency (55-65 Hz) narrowband  
154 gamma oscillation derived from sub-cortical circuits, demonstrating a specific role of VIP in controlling  
155 stimulus-induced cortical gamma synchronization only (Fig. S7).

156 Since locomotion also controls the gain of visually evoked activity in V1 (Niell & Stryker, 2010) and potently  
157 regulates visually induced gamma oscillations (Fig. S3), we asked whether VIP neurons contribute to the  
158 behavioral dependence of gamma band synchronization. We found that suppressing VIP neurons strongly  
159 enhanced gamma band power and phase coupling of V1 units across both locomoting and quiescent states  
160 (Fig. S8A-C, 3-way ANOVA with factors light, locomotion and stimulus with post-hoc testing, all  $p < 0.001$ ,  
161 no interactions), but preferentially during locomotion (Fig. S8D-F), demonstrating that VIP neurons  
162 regulate the behavioral modulation of network synchronization in mouse V1.

163 Taken together, these results demonstrate that locally, VIP neurons scale the power of gamma band  
164 rhythms both as a function of the stimulus and as a function of brain state. Yet contrary to expectations,  
165 they appear to play no role in the tuning of gamma band power to any of these features.

166

### 167 **VIP neurons globally tune the coherence of V1 ensembles**

168 One of the most striking features of V1 gamma band oscillations is that they preferentially synchronize  
169 distant neurons that are processing separate parts of a stimulus with common properties, such as the  
170 same orientation and direction of motion (Gray *et al.*, 1989), indicative of belonging to a common object.  
171 The mechanisms for this fundamental phenomenon remain largely unknown. Optogenetically suppressing  
172 SST neurons strongly reduces this global coherence (Veit *et al.*, 2017), but this could be a simple  
173 consequence of the strong suppression of local gamma rhythms at both locations. One possibility is that  
174 VIP neurons preferentially suppress global coherence when the stimulus features between two  
175 retinotopic locations conflict, but permit coherence when those features are shared. To test this, we  
176 placed one multielectrode array in the retinotopic region corresponding to the center of the grating, and  
177 one in a distal region representing the surround (Fig. 2A, average electrode separation:  $530 \pm 90 \mu\text{m}$   $n =$   
178  $7$ ,  $15 \pm 3$  visual degrees  $n = 11$ , Fig. S9). Similar to findings in cats (Gray *et al.*, 1989), large, homogeneous  
179 ('iso-oriented') drifting gratings drove highly coherent LFP gamma oscillations between the two separate  
180 sites (Fig. 2B top). However, when the grating orientation for the two separated electrode arrays was  
181 orthogonal ('cross-oriented'), coherence in the gamma frequency band, dropped substantially (Fig. 2B

182 bottom:  $23 \pm 5.7\%$ ,  $p = 0.004$  Wilcoxon signed rank). If VIP neurons would simply reduce coherence  
 183 according to the reduction in gamma power, we would expect coherence to increase similarly for both  
 184 matched (iso) and non-matched (cross) stimulus features. However, optogenetically suppressing VIP  
 185 neurons had no impact on global coherence for iso-oriented gratings (Fig. 2C,D,  $4.5 \pm 2.6\%$ ,  $p = 0.16$ ,  
 186 Wilcoxon signed rank test), but significantly increased coherence for cross-oriented gratings ( $18.6 \pm 8.2\%$ ,  
 187  $p = 0.008$ , Wilcoxon signed rank test). The impact on coherence for cross-oriented gratings was highly  
 188 specific to the visually induced gamma band ( $\sim 30$  Hz) (Fig. 2E,F).

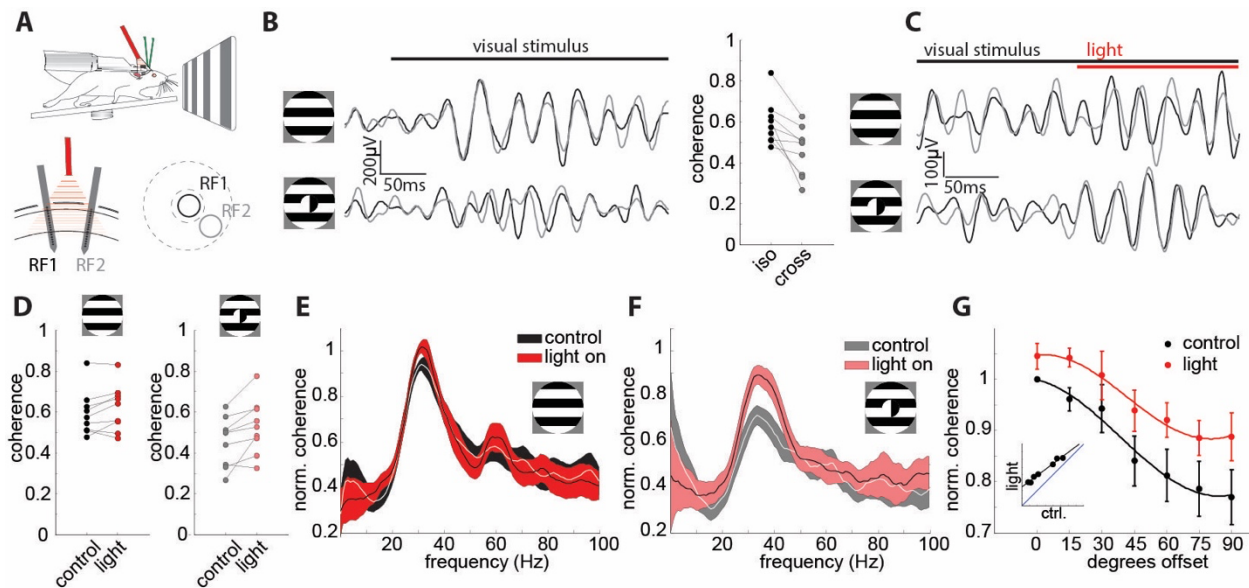

**Figure 2: VIP neurons globally tune the coherence of visual ensembles.** **A:** Top: recording schematic with two independent laminar probes in V1 of awake, head-fixed VIP-Cre mice. Bottom left: Schematic of the multi-electrode array recording configuration with two laminar arrays in distant sites ( $530 \pm 90 \mu\text{m}$  apart, histology from  $n = 7$  mice) recorded from two separate receptive fields (RF1 and RF2,  $15^\circ \pm 3^\circ$  of visual angle separation,  $n = 11$  mice). Bottom right: schematic of the receptive fields' locations on the two laminar probes. The center and surround of the gratings are indicated with dashed lines. **B:** Left: Example filtered LFP traces in response to an iso ( $0^\circ$  offset, top) and a cross ( $90^\circ$  offset, bottom) oriented surround relative to the center. Traces from the center recording site are plotted in black, traces from the surround in gray. Right: Plot comparing the LFP gamma band coherence for iso-oriented to cross-oriented surround stimuli ( $n = 9$ ,  $p = 0.004$ , Wilcoxon signed rank test). **C:** Example filtered LFP traces in response to an iso ( $0^\circ$  offset, top) and a cross ( $90^\circ$  offset, bottom) oriented surround relative to the center. Traces from the center recording site are plotted in black, traces from the surround in gray. The onset of light to suppress VIP cell activity is shown as a red bar on top. **D:** Left: Plot comparing the LFP gamma band coherence for iso-oriented surround stimuli for control (black) and VIP inactivation (red) trials ( $n = 9$ ,  $p = 0.16$ , Wilcoxon signed rank test) Right: Plot comparing the LFP gamma band coherence for cross-oriented surround stimuli for control (gray) and light (light red) trials ( $n = 9$ ,  $p = 0.008$ , Wilcoxon signed rank test). **E:** Population averaged coherence spectra, normalized to the maximum of control condition, for iso-oriented surround stimuli for control (black) and light (red) trials ( $n = 10$ , thickness of line denotes mean  $\pm$  standard error). **F:** Population averaged coherence spectra for cross-surround stimuli for control (gray) and light (light red) trilas ( $n = 10$ , thickness of line denotes mean  $\pm$  standard error). **G:** Plot of average normalized coherence versus relative surround orientation with (red) and without (black) inactivation of VIP neurons ( $n = 9$ , 2-way ANOVA: main effect of light:  $F(1,107) = 18.8$ ,  $p < 0.001$ ; main effect of offset angle:  $F(6,107) = 9.16$ ,  $p < 0.001$ ; interaction:  $F(6,107) = 0.22$ ,  $p = 0.97$ ). Error bars represent s.e.m.

189

190 These results demonstrate that VIP neurons critically contribute to long-range synchronization of  
 191 primary visual cortical ensembles: they preferentially suppress synchrony when the stimulus features for  
 192 distant ensembles do not match. Remarkably, even though VIP neuron suppression profoundly enhanced  
 193 local gamma power in response to iso-oriented gratings (see Fig. 1D), it did not significantly increase  
 194 coherence. Note that the lack of an increase in coherence for iso-oriented stimuli was not due to a ceiling  
 195 effect, as the measured coherence was substantially less than the theoretical maximum of 1 (mean  
 196 coherence iso:  $0.60 \pm 0.04$ , mean coherence iso+light:  $0.62 \pm 0.04$  iso)(Fig. 2C). This demonstrates that

197 the local and global properties of stimulus induced gamma oscillations in the visual cortex can be  
198 uncoupled: VIP neurons generally suppress the strength of gamma rhythms for all stimuli, but they only  
199 suppress the coherence of gamma rhythms when the features being processing by two distant sites in V1  
200 conflict.

201

### 202 **Computational modeling of V1 explains VIP neurons role in local and global gamma synchronization**

203 To gain insight into how VIP neurons might scale gamma power locally but regulate gamma coherence  
204 globally we developed a computational model of layer 2/3 of mouse V1 composed of its four primary cell  
205 types modeled by integrate-and-fire spiking dynamics (Fig. 3A). Neurons were connected according to  
206 well-known rules (see Supplemental Methods), though to maintain simplicity, VIP neurons only targeted  
207 SST neurons and were themselves driven exclusively by an external (untuned) bias input. To account for  
208 stimulus size, multiple discrete retinotopic circuits were connected via horizontal excitatory connections,  
209 the strength of which was larger for iso-tuned center and surround populations compared to cross-tuned  
210 populations (Fig. 3A). The model produced stochastic spiking dynamics that readily generated robust  
211 population gamma rhythms (Fig. 3B). The summed population activity was well-captured by a mean-field  
212 approximation which is constructed from linearized neuronal responses (Fig. 3C-D, compare the  
213 simulation points to the smooth lines computed from the theory; see Supplemental Methods). Despite  
214 only including a subset of key features of the mouse V1 network, these gamma rhythms scaled with  
215 stimulus strength ( $\approx$ contrast), size, and center/surround orientation in a qualitatively similar fashion as  
216 our experimental results (Fig. 3E-G, gray curves). Moreover, reducing VIP activity to mimic the effects of  
217 optogenetically suppressing VIP neurons yielded qualitatively similar impacts on gamma power across  
218 stimulus dimensions (Fig. 3E-G, red curves). This shows that a fairly minimal model captures the core  
219 phenomenology of visually induced gamma rhythms in V1 and could qualitatively predict the scaling of  
220 gamma power across stimulus space by VIP neurons.

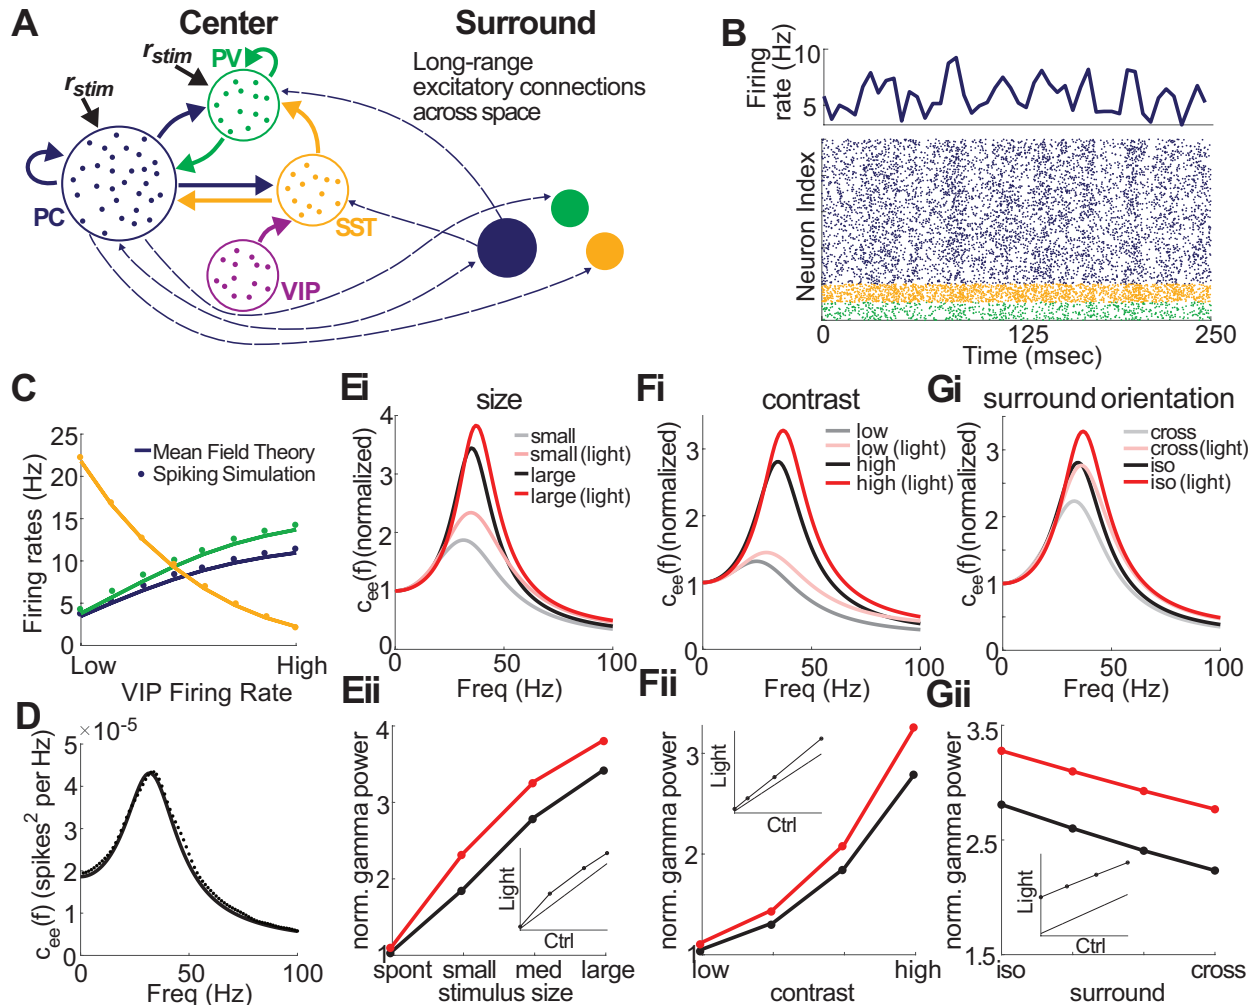

**Figure 3: Minimal computational model captures VIP neurons' role in controlling gamma power.** **A:** Schematic of the local connectivity across the four cell types, along with the long-ranged excitatory connections (dashed arrows) spanning across space. All populations receive a static background current, while PC and PV neurons receive stimulus-dependent drives. For a large stimulus size, an additional surround population was added (see Supplemental Methods). **B:** Bottom: Raster plot showing the spike times of neurons from the PC, PV, and SST populations. Top: Average firing rate (averaged over a 5 msec time window) across the excitatory population. **C:** Average firing rates across the populations for the spiking simulation and mean-field theory as a function of VIP firing rates. **D:** Example of the power spectrum for spiking simulations (dots) and mean-field theory (solid line) showing a strong peak in the gamma frequency. **E:** Ei: Normalized power spectrum from the mean-field model as a function of stimulus size. The red lines illustrate the result of suppressing VIP neurons (i.e., mimicking the optogenetic suppression done experimentally). Eii: Normalized gamma power taken from the power spectrum of panel Ei. **F,G:** Same as E, except for contrast and surround orientation. Similar to experimental results, increasing the size (and contrast) of the stimulus results in a noticeable increase in gamma power. Likewise, iso-surround exhibits larger gamma power than cross-surround. Further, suppressing VIP leads to a linear increase in gamma power across conditions.

221

222 Next, we asked in the model how VIP neurons could globally tune coherence despite locally only  
 223 scaling gamma power. In agreement with our experimental results, we found that high VIP activity in the  
 224 model specifically suppressed coherence for cross-oriented as compared to iso-oriented gratings (Fig. 4A-  
 225 B). We then probed which features of VIP connectivity in the model might be important for this result.  
 226 First, we constructed a model where VIP directly inhibited PV neurons rather than the SST neurons (Fig.  
 227 4C). This model could not reproduce the core experimental results, putatively because PV neurons are key



228 stabilizers in this circuit (Bos *et al.*, 2020). As a result, their suppression led to a large increase in excitatory  
 229 firing rates, resulting in an increase in gamma power and gamma coherence under the iso-oriented  
 230 condition (Fig. 4Cii). Finally, we constructed a model where VIP neurons non-specifically targeted all other  
 231 cell types in the circuit. While this model could capture the impact of VIP activity on overall coherence, it  
 232 could not recapitulate the selective effect on cross-oriented gratings (Fig. 4D). These modeling  
 233 experiments imply that the selective inhibitory-inhibitory wiring between VIPs and SSTs is central to the  
 234 feature-dependence of gamma band coherence across V1 as simpler circuits could not robustly reproduce  
 235 this core phenomenology.  
 236

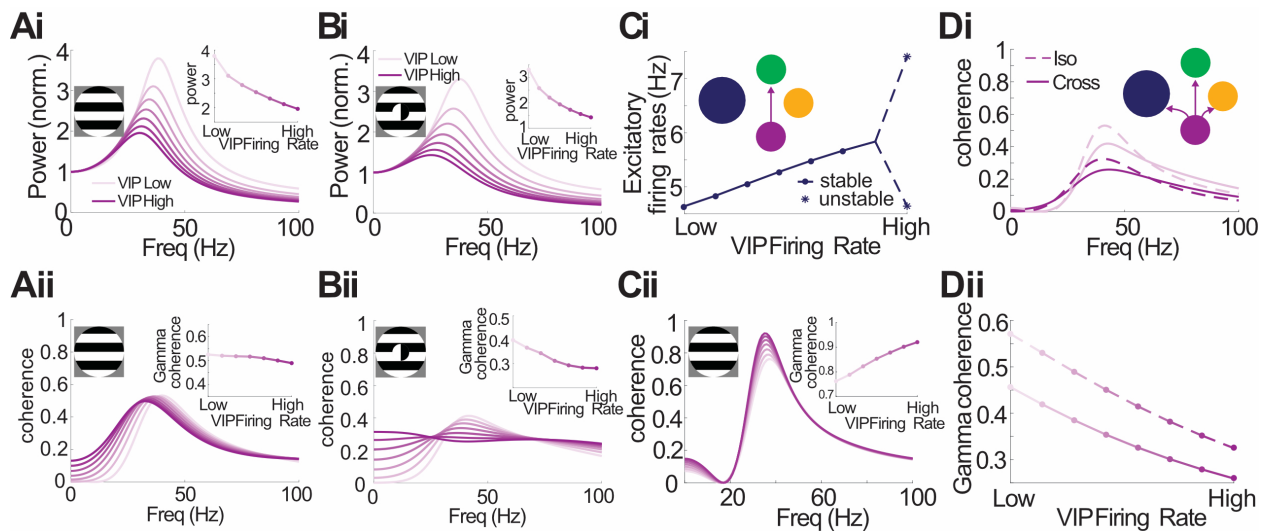

**Figure 4: Connectivity of VIP neurons in the local circuit is crucial for controlling gamma coherence.** **A:** Normalized gamma power (Ai) and coherence (Aii) for an iso-surround as a function of VIP firing rate. Despite gamma power decreasing as VIP firing rate increases (Ai, inset) the coherence at the gamma frequency remains relatively constant (Aii, inset). **B:** Same as A, except with a cross-surround. In this case, a decrease in gamma power coincides with a decrease in coherence at the gamma frequency. **C:** Simulations results for an iso-surround with a model where VIP inhibits PV, as opposed to SST (Ci, inset). Ci: Firing rate curve showing that stability is lost as VIP firing rates increase (dots are stable steady states, stars indicate the max and min of the oscillatory solution). Cii: Coherence curves, which, as opposed to the default model, shows an increase in gamma coherence as VIP firing rates increase (inset). **D:** Di: Coherence curves for an iso- (dashed) and cross-surround (solid) with high (dark lines) and low (light lines) VIP firing rates, where the model considers a VIP population that inhibits PC, PV, and SST populations with equal strength (inset). Dii: Gamma coherence decreases significantly for both the iso- and cross-surround conditions.

237

## 238 Discussion

239 The data in this study establishes the disinhibitory VIP cell as a crucial regulator of gamma rhythms in the  
 240 primary visual cortex. Importantly, optogenetically suppressing VIP neurons profoundly impacted the  
 241 strength and spatial coherence of gamma rhythms, but did so in highly unexpected ways. Recent studies  
 242 have highlighted the opposing responses of VIP and SST neurons to varied visual stimuli (Keller *et al.*, 2020;  
 243 Millman *et al.*, 2020; Mossing *et al.*, 2021). While SST neurons are strongly driven by large high contrast,  
 244 iso-oriented gratings, VIP neurons are suppressed by these stimuli and instead driven best by small, low  
 245 contrast, or cross-oriented gratings. Two of these studies proposed or directly showed through  
 246 optogenetic perturbations that VIP neurons tune the pyramidal network along these stimulus properties.  
 247 All of this data supported a hypothesis wherein VIP neurons would likewise tune the stimulus-dependence  
 248 of gamma oscillations. Strikingly and unexpectedly, our data refute this notion, as suppressing VIP  
 249 neurons had a nearly exclusive impact on the gain of gamma rhythms, not their stimulus tuning. The most  
 250 dramatic change in gamma power during VIP suppression was for the largest, and highest contrast iso-  
 251 oriented gratings, while we observed fairly small effects for small, low contrast or cross-oriented gratings.

252           These data could have supported a relatively simple, albeit counterintuitive, model where the  
253 only role of VIP neurons in cortical gamma band rhythms was to control the gain of gamma band  
254 synchrony locally. However, our data with multi-site recording demonstrate that VIP neurons have a  
255 second, and arguably more important function in the global properties of gamma oscillations. VIP-  
256 mediated disinhibition, putatively through inhibition of SST neurons, preferentially suppressed inter-site  
257 coherence when the two sites were processing non-matched stimulus features, such as different  
258 orientations. Conversely, when these stimulus features matched, VIP neurons permit spatial coherence,  
259 even while they simultaneously scale down the total power of gamma divisively.

260           This raises a crucial next question: why do VIP neurons dampen gamma oscillations locally but  
261 permit coherence globally, depending on the visual context? One idea is that this local, divisive scaling of  
262 synchrony prevents the hyper-synchronization of cortical pyramidal neurons that might lead to aberrant  
263 propagation of activity to higher cortical areas (Salinas & Sejnowski, 2001). In the same vein, VIP neuron  
264 activity might enhance visual perception by expanding the dynamic range of stimulus-dependent  
265 oscillatory dynamics. Importantly, even as they reduce local rhythmicity, VIP neurons allow distant  
266 network oscillators to couple when they are processing matched stimulus features. This might enhance  
267 the output of downstream neurons integrating across cortical space. VIP activity could thus act as a  
268 temporal filter in the gamma band for spatially continuous image features, such as contours and surfaces  
269 of objects.

270           The VIP-dependent decoupling between local and global neural synchronization argues that  
271 gamma power and coherence are not necessarily intrinsically linked. Superficially, this finding conflicts  
272 with a recent study which argues that gamma power and coherence should always be highly correlated  
273 (Schneider *et al.*, 2021). However, this study primarily considered sender and receiver populations that  
274 reside in different brain areas, rather than differentially tuned and spatially separate populations in the  
275 same cortical region, which we study here. Our theoretical work also differs from Schneider *et al.* (2021),  
276 in that we use standard techniques from non-equilibrium statistical mechanics to calculate the spike train  
277 power and cross-spectrums. As a result, a shift in the operating point (through changing contrast, VIP  
278 activation, cross vs. iso surround) changes the power and cross-spectrums in different ways. Since our  
279 formula for coherence depends on both of these quantities for a finite number of neurons, coherence will  
280 not be intrinsically linked to power without additional assumptions (see Supplemental Methods). In light  
281 of our experimental observations, such assumptions do not hold across spatial locations in V1.

282           A key outstanding question is what excitatory inputs drive VIP neurons, and in turn, how they  
283 mediate their divergent local and global effects. Although VIP neurons are known targets of corticocortical  
284 feedback axons from higher cortical areas, (Lee *et al.*, 2013; Zhang *et al.*, 2014) they are also local targets  
285 of V1 horizontal axons in layer 2/3 (Xu & Callaway, 2009; Karnani, Jackson, Ayzenshtat, Tucciarone, *et al.*,  
286 2016). Our computational modeling implies that both the local and global action of VIP on gamma rhythms  
287 can be mediated entirely within V1. Analysis of the model revealed several key features that were  
288 important for the robustness of capturing the physiological results. First, and most intuitively, global  
289 coherence depended on specific like-to-like (i.e. iso-oriented) connectivity between center and surround  
290 circuits. Second, for capturing the selective effect of VIP on suppressing coherence to cross-oriented  
291 stimuli, it was important that VIP selectively targeted SST, as alternative models that generalized VIP  
292 neurons to target other cell types fell short in capturing our experimental results. Third, and perhaps least  
293 intuitively, in our model VIP neurons did not need tuned input from the local V1 network. Although VIP  
294 neurons do receive recurrent excitation from L2/3 PCs, our modeling surprisingly suggests that tuned  
295 excitatory input is not required for VIPs role in regulating the stimulus-dependence global coherence –  
296 rather they can enforce this effect through their powerful inhibition of SSTs which do get tuned recurrent  
297 input in the model.

298           Taken together, our data reveal a key new mechanism for the dynamic control of gamma-band  
299 neural synchronization in the primary visual cortex. As the same disinhibitory circuits exist in other sensory

300 and higher cortical areas, the role of VIP neurons in controlling the gain and spatial coherence of gamma  
301 entrainment might be a general feature of cortical networks. Furthermore, our data suggest that VIP  
302 neurons might be potential therapeutic targets in neurological disorders that are associated with altered  
303 gamma rhythms and defects in inhibitory neural circuitry. Optogenetic or pharmacological tools aimed at  
304 re-balancing activity in VIP neurons, or perhaps more specific subsets of VIP neurons, should thus be  
305 useful in understanding the role of gamma rhythms in normal brain function and perhaps correcting it in  
306 disease.

307

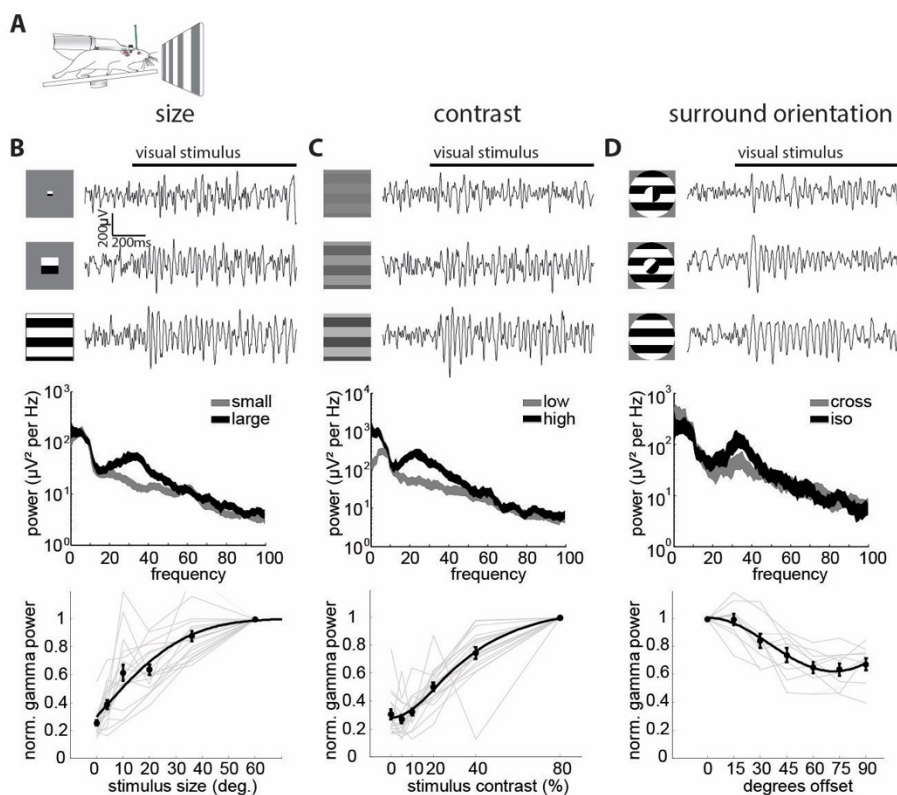

308

**Figure S1. Stimulus dependence of the visually induced gamma rhythm in V1 of awake, running mice.** **A:** Experimental schematic of a head-fixed mouse on a running wheel facing a screen for visual stimulation. **B:** Top: three example LFP traces filtered between 10 and 90 Hz in response to a small ( $4^\circ$ , top), medium ( $20^\circ$ , middle) and large ( $60^\circ$ , bottom) drifting grating (temporal frequency, 2 Hz). Middle: example LFP power spectrum in response to a small ( $4^\circ$ ) and large ( $60^\circ$ ) drifting grating (thickness of line denotes mean  $\pm$  standard error). Bottom: Plot of normalized peak gamma power (peak frequency:  $28.8 \pm 0.5$  Hz) versus stimulus size (Kruskal-Wallis ANOVA:  $p < 0.0001$ ,  $n = 17$ ). **C:** Top: three example filtered LFP traces in response to a low (5%, top), medium (20%, middle) and high (80%, bottom) contrast drifting grating. Middle: example LFP power spectrum in response to low (5%) and high (80%) contrast gratings (thickness of line denotes mean  $\pm$  standard error). Bottom: Plot of normalized peak gamma power (peak frequency:  $27.3 \pm 0.6$  Hz) versus stimulus contrast (Kruskal-Wallis ANOVA:  $p < 0.0001$ ,  $n = 18$ ). **D:** Top: three example filtered LFP traces in response to a grating with cross- ( $90^\circ$  offset, top), intermediate- ( $45^\circ$  offset, middle) and iso-oriented ( $0^\circ$  offset, bottom) surround relative to the center. Middle: Example LFP power spectrum in response to iso and cross oriented surround grating (thickness of line denotes mean  $\pm$  standard error). Bottom: Plot of normalized peak gamma power (peak frequency:  $32.8 \pm 0.4$  Hz) versus stimulus contrast (Kruskal-Wallis ANOVA:  $p < 0.0001$ ,  $n = 10$ ). Error bars in all plots represent s.e.m.

309

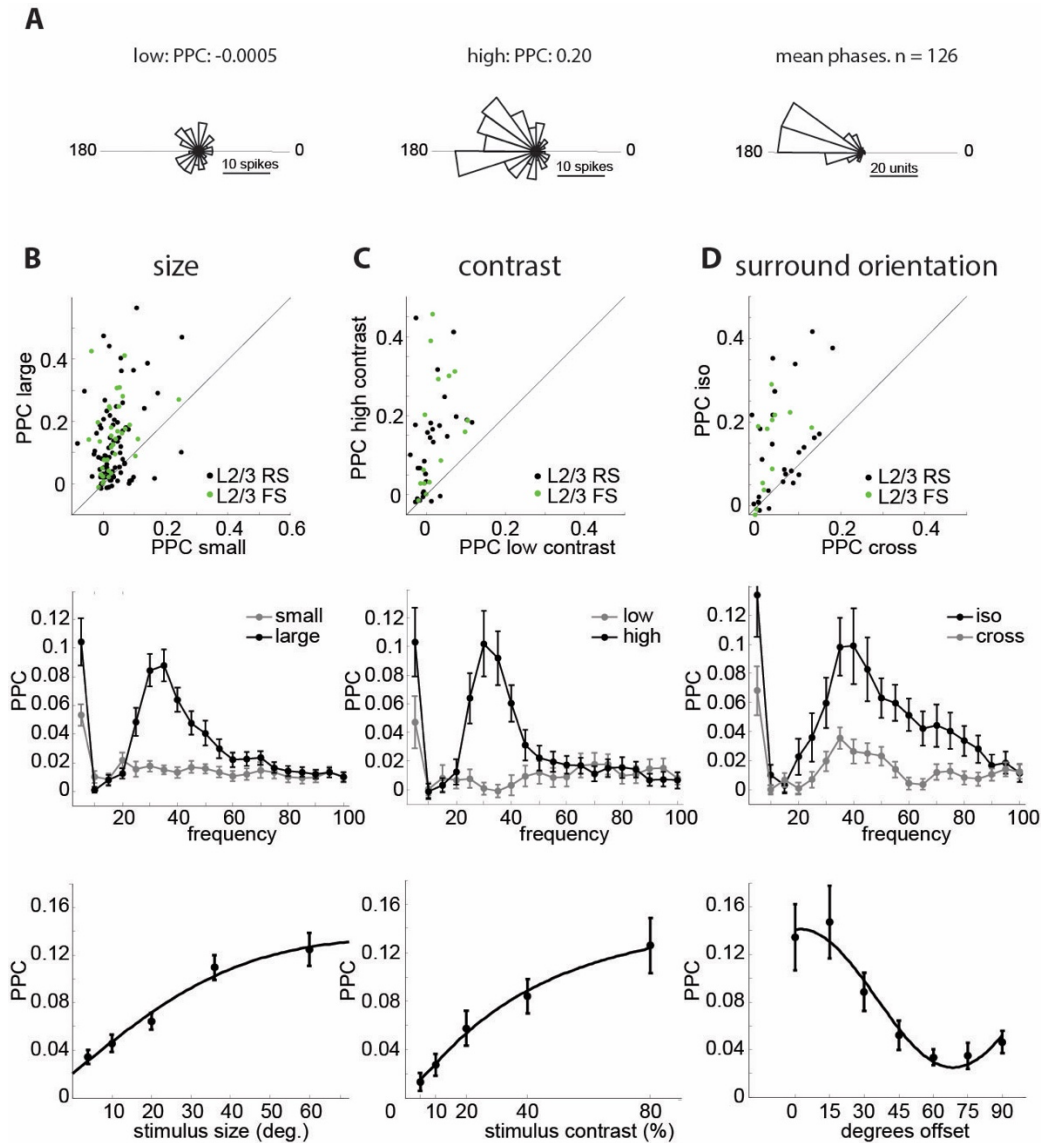

310

311 **Figure S2: Single units lock to visually induced gamma oscillations in a stimulus-dependent manner.** **A:** Left: phase histogram  
 312 of the spikes of an example L2/3 RS unit relative to the gamma oscillation in response to a low contrast (5%) stimulus. Middle:  
 313 similar histogram from the spikes of the same neuron evoked by a high contrast (80%) stimulus. Right: histogram of the average  
 314 spike phases of all 126 included L2/3 RS cells included for a large high contrast grating. Cells tend to fire shortly before the trough  
 315 of the oscillation (180°). **B:** Top: scatter plot of PPC values for single RS (black, n = 78, p<0.0001, Wilcoxon signed rank test) and  
 316 FS (green, n = 32, p<0.0001, Wilcoxon signed rank test) units in response to small (4°) and large (60°) full contrast stimuli. Middle:  
 317 average PPC spectra for L2/3 RS cells (n = 78) for small (gray, 4°) and large (black, 60°) full contrast stimuli. Bottom: Plot of average  
 318 PPC at individual gamma center frequency versus stimulus size for L2/3 RS units (n = 87, p < 0.0001, Kruskal-Wallis ANOVA). **C:**  
 319 Top: scatter plot of PPC values for single RS (black, n = 29, p<0.0001, Wilcoxon signed rank test) and FS (green, n = 15, p<0.0001,  
 320 Wilcoxon signed rank test) units in response to large low (5%) and high (80%) contrast stimuli. Middle: average PPC spectra for  
 321 L2/3 RS cells (n = 29) for large low (gray, 5%) and high (black, 80%) contrast stimuli. Bottom: plot of average PPC at individual  
 322 gamma center frequency versus stimulus contrast for L2/3 RS units (n = 29, p < 0.0001, Kruskal-Wallis ANOVA). **D:** Top: scatter  
 323 plot of PPC values for single RS (black, n = 27, p = 0.0008, Wilcoxon signed rank test) and FS (green, n = 13, p = 0.003, Wilcoxon  
 324 signed rank test) cells in response to full contrast cross (90° offset) and iso (0° offset) surround stimuli. Middle: average PPC  
 325 spectra for L2/3 RS cells (n = 27) for full contrast cross (gray, 90° offset) and iso (black, 0° offset) surround stimuli. Bottom: plot  
 326 of average PPC at individual gamma center frequency versus relative surround orientation for L2/3 RS units (n = 28, p = 0.004,  
 327 Kruskal-Wallis ANOVA). Error bars in all plots represent s.e.m.; see Supp Fig 1 for FS data.

328

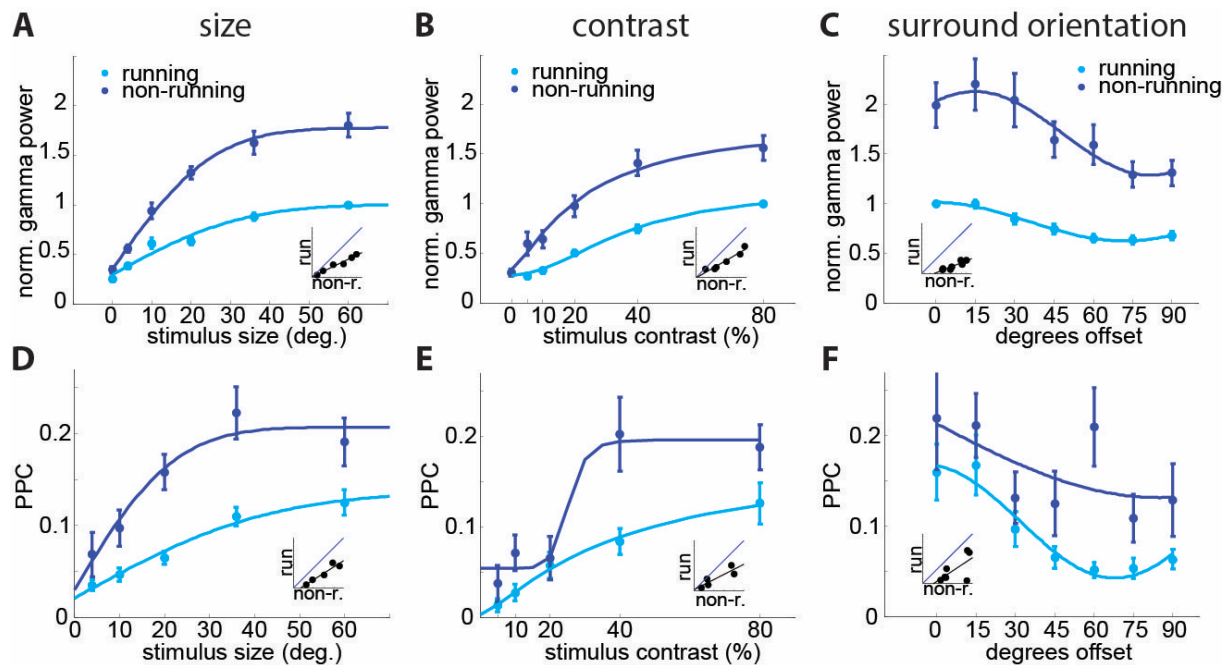

**Figure S3: Gamma power and phase locking depend on behavioral state.** **A:** Average normalized gamma power during running (light blue) and non-running (dark blue) versus stimulus size ( $n = 17$ , 2-way-ANOVA: main effect of size:  $F(4,146) = 45.34$ ,  $p < 0.001$ ; main effect of running  $F(1,146) = 122.49$ ,  $p < 0.001$ ; interaction:  $F(4,146) = 6.40$ ,  $p < 0.001$ ). **B:** Average normalized gamma power during running and non-running versus stimulus contrast ( $n = 18$ , 2-way ANOVA: main effect of contrast:  $F(4,149) = 33.68$ ,  $p < 0.001$ ; main effect of running:  $F(1,149) = 67.82$ ,  $p < 0.001$ ; interaction:  $F(4,149) = 1.39$ ,  $p = 0.24$ ). **C:** Average normalized gamma power during running and non-running versus relative surround orientation ( $n = 10$ , 2-way ANOVA: main effect of orientation:  $F(6,108) = 6.38$ ,  $p < 0.001$ ; main effect of running:  $F(1,108) = 156.02$ ,  $p < 0.001$ ; interaction:  $F(6,108) = 1.34$ ,  $p = 0.24$ ). **D:** Average PPC during running (light blue) and non-running (dark blue) versus stimulus size ( $n = 87$ , 2-way-ANOVA: main effect of size:  $F(4,835) = 16.3$ ,  $p < 0.001$ ; main effect of running:  $F(1,835) = 37.74$ ,  $p < 0.001$ ; interaction  $F(4,835) = 1.1$ ,  $p = 0.36$ ). **E:** Average PPC during running and non-running versus stimulus contrast ( $n = 29$ , 2-way-ANOVA: main effect of contrast:  $F(4,256) = 14.02$ ,  $p < 0.001$ ; main effect of running:  $F(1,256) = 13.49$ ,  $p < 0.001$ ; interaction:  $F(4,256) = 1.9$ ,  $p = 0.11$ ). **F:** Average PPC during running and non-running versus relative surround orientation ( $n = 28$ , 2-way-ANOVA: main effect of orientation:  $F(6,328) = 3.75$ ,  $p = 0.001$ ; main effect of running:  $F(1,328) = 15.46$ ,  $p < 0.001$ ; interaction:  $F(6,328) = 0.84$ ,  $p = 0.54$ ). Error bars in all plots represent s.e.m.

329

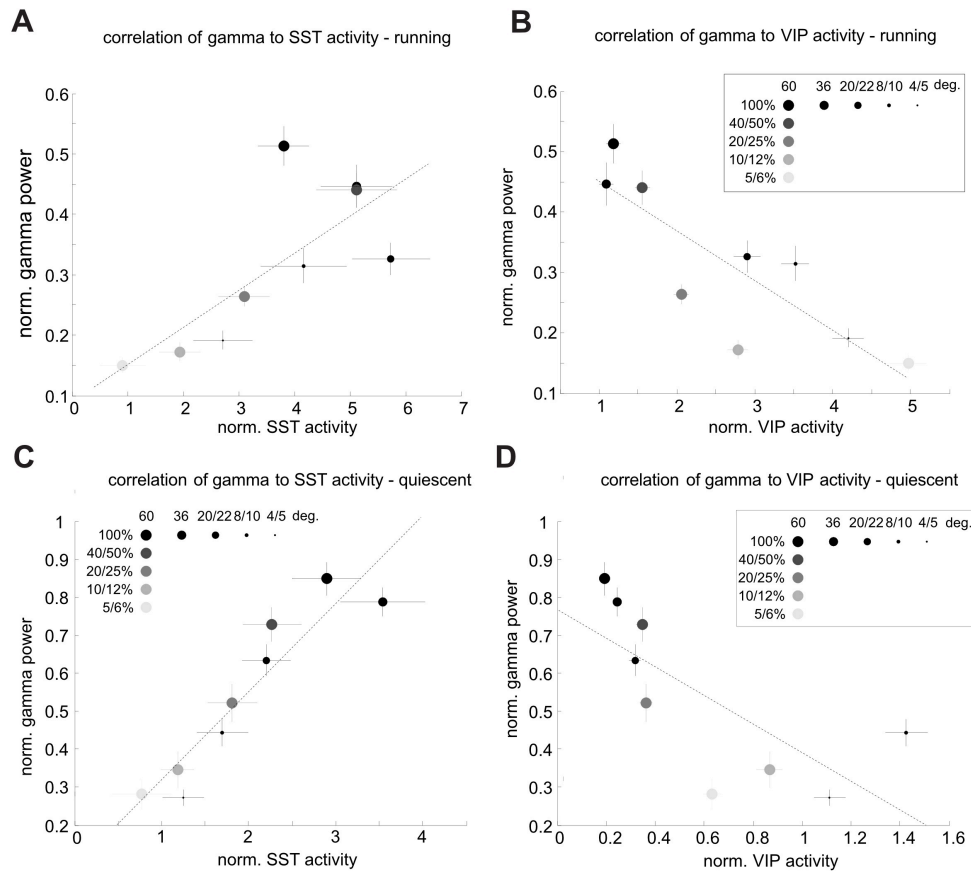

**Figure S4: Opposing correlation of SST- and VIP-neuron activity with gamma power.** **A:** Plot of averaged normalized gamma power in the running condition vs. averaged normalized SST-cell activity (deconvolved event-rate/mean), recorded via 2-photon imaging in a different set of animals across similar conditions. Different shades of gray represent different contrast levels and different symbol sizes represent different stimulus sizes. Dashed line is a linear fit of the data. SST-cell activity strongly correlates with gamma power ( $r(7) = 0.76$ ,  $p = 0.019$ ). **B:** Same as A, except for normalized VIP cell activity. VIP activity is strongly anti-correlated with gamma power ( $r(7) = -0.84$ ,  $p = 0.005$ ). **C:** Same as A, except in the quiescent state. SST-cell activity is strongly correlated to gamma power ( $r(7) = 0.93$ ,  $p < 0.001$ ). **D:** Same as B, except in the quiescent state. VIP activity is strongly anti-correlated to gamma power ( $r(7) = -0.73$ ,  $p = 0.024$ ).

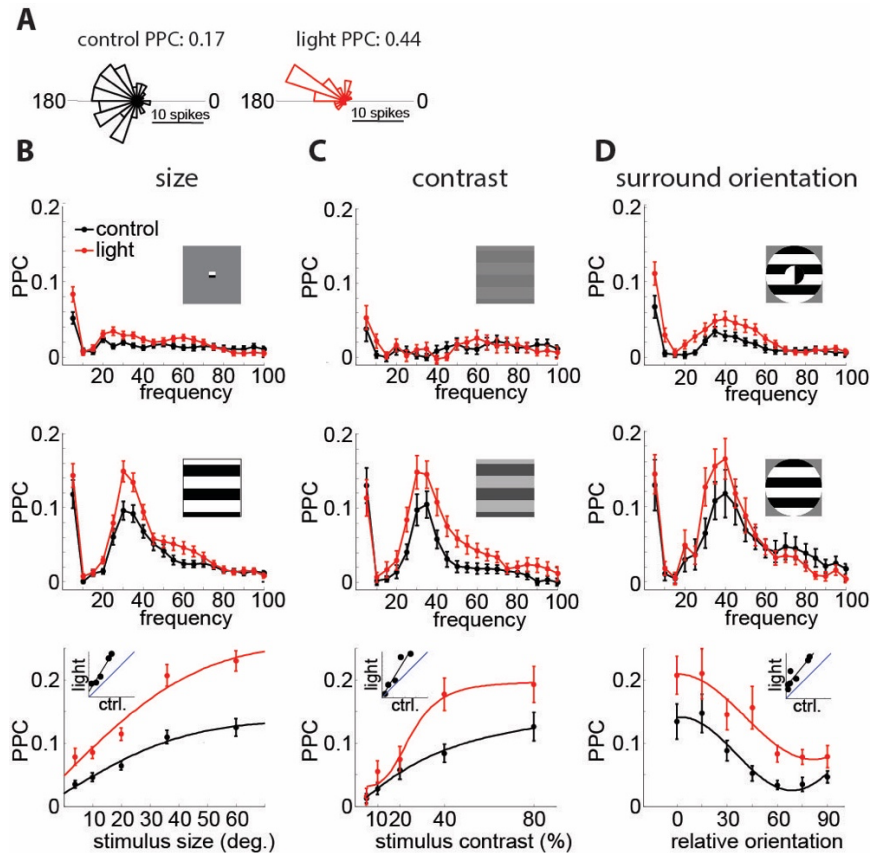

**Figure S5: VIP neurons linearly control the strength of locking of single neurons to the visually induced gamma rhythm.** **A:** Left: phase histogram of the spikes of an example L2/3 RS neuron relative to the gamma oscillation in the control condition (60° grating, same unit as in Fig. 2). Right: phase histogram of the spikes of the same neuron during inactivation of VIP neurons. **B:** Top: average PPC spectra for L2/3 RS cells with (red) and without (black) suppression of VIP neurons ( $n = 78$ ) for small (4°) stimuli. Middle: average PPC spectra for L2/3 RS cells with (red) and without (black) suppression of VIP neurons ( $n = 68$ ) for large (60°) stimuli. Bottom: Plot of average PPC versus stimulus size with (red) and without (black) light-mediated inactivation of VIP neurons ( $n = 87$ , 2-way ANOVA: main effect of light:  $F(1,857) = 78.42$ ,  $p < 0.001$ ; main effect of size:  $F(4,857) = 42.83$ ,  $p < 0.001$ ; interaction:  $F(4,857) = 3.14$ ,  $p = 0.014$ ). **C:** Top: average PPC spectra for L2/3 RS cells with (red) and without (black) suppression of VIP neurons ( $n = 27$ ) for low contrast (5%) stimuli. Middle: average PPC spectra for L2/3 RS cells with (red) and without (black) suppression of VIP neurons ( $n = 30$ ) for high contrast (80%) stimuli. Bottom: Plot of average PPC versus stimulus contrast with (red) and without (black) inactivation of PV neurons ( $n = 29$ , 2-way ANOVA: main effect of light:  $F(1,280) = 13.01$ ,  $p < 0.001$ ; main effect of contrast:  $F(4,280) = 21.8$ ,  $p < 0.001$ ; interaction:  $F(4,280) = 2.17$ ,  $p = 0.072$ ). **D:** Top: average PPC spectra for L2/3 RS cells with (red) and without (black) suppression of VIP neurons ( $n = 46$ ) for cross surround (90° offset) stimuli. Middle: average PPC spectra for L2/3 RS cells with (red) and without (black) suppression of VIP neurons ( $n = 21$ ) for iso surround (0° offset) stimuli. Bottom: Plot of average PPC versus relative surround orientation with (red) and without (black) inactivation of VIP neurons ( $n = 28$ , 2-way ANOVA: main effect of light:  $F(1,378) = 28.66$ ,  $p < 0.001$ ; main effect of orientation:  $F(6,378) = 10.31$ ,  $p < 0.001$ ; interaction:  $F(6,378) = 0.69$ ,  $p = 0.66$ ). Error bars in all plots represent s.e.m.

334

335

336



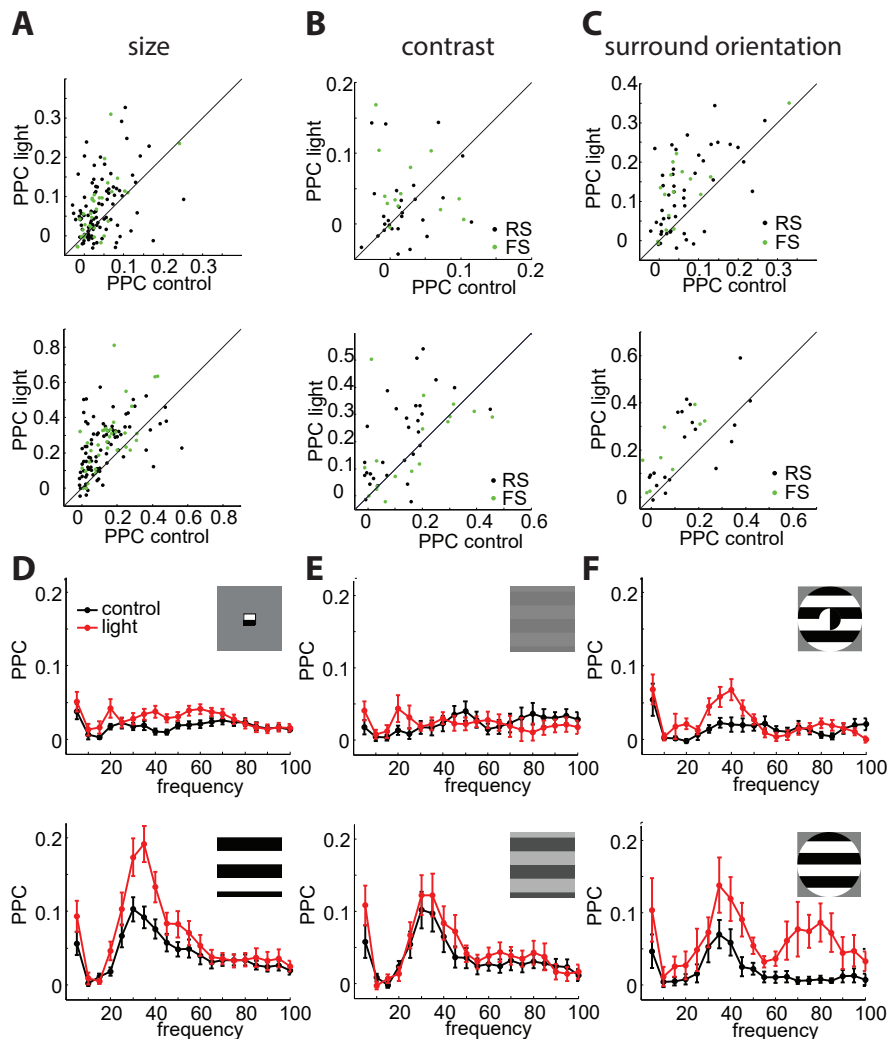

**Fig. S6. Effects of VIP inactivation on locking of single RS and FS cells.** **A:** Top: scatter plot of PPC values for single RS (black,  $n = 90$ ,  $p = 0.0001$ , Wilcoxon signed rank test) and FS (green,  $n = 33$ ,  $p = 0.002$ , Wilcoxon signed rank test) cells in response to small (4°) stimuli in control condition versus VIP suppression. Bottom: scatter plot of PPC values for single RS (black,  $n = 87$ ,  $p = 0.0004$ , Wilcoxon signed rank test) and FS (green,  $n = 35$ ,  $p = 0.002$ , Wilcoxon signed rank test) cells in response to large (60°) stimuli in control condition versus VIP suppression. **B:** Top: scatter plot of PPC values for single RS (black,  $n = 27$ ,  $p = 0.61$ , Wilcoxon signed rank test) and FS (green,  $n = 13$ ,  $p = 0.31$ , Wilcoxon signed rank test) cells in response to low contrast (5%) stimuli in control condition versus VIP suppression. Bottom: scatter plot of PPC values for single RS (black,  $n = 30$ ,  $p = 0.001$ , Wilcoxon signed rank test) and FS (green,  $n = 17$ ,  $p = 0.98$ , Wilcoxon signed rank test) cells in response to large (60°) stimuli in control condition versus VIP suppression. **C:** Top: scatter plot of PPC values for single RS (black,  $n = 46$ ,  $p < 0.0001$ , Wilcoxon signed rank test) and FS (green,  $n = 15$ ,  $p = 0.0006$ , Wilcoxon signed rank test) cells in response to cross surround stimuli in control condition versus VIP suppression. Bottom: scatter plot of PPC values for single RS (black,  $n = 21$ ,  $p = 0.04$ , Wilcoxon signed rank test) and FS (green,  $n = 9$ ,  $p = 0.004$ , Wilcoxon signed rank test) cells in response to iso surround (0° offset) stimuli in control condition versus VIP suppression. **D:** Top: average PPC spectra for L2/3 FS cells with (red) and without (black) suppression of VIP neurons ( $n = 30$ ) for small (4°) stimuli. Bottom: average PPC spectra for L2/3 FS cells with (red) and without (black) suppression of VIP neurons ( $n = 32$ ) for large (60°) stimuli. **E:** Top: average PPC spectra for L2/3 FS cells with (red) and without (black) suppression of VIP neurons ( $n = 13$ ) for low contrast (5%) stimuli. Bottom: average PPC spectra for L2/3 FS cells with (red) and without (black) suppression of VIP neurons ( $n = 17$ ) for high contrast (80%) stimuli. **F:** top: average PPC spectra for L2/3 FS cells with (red) and without (black) suppression of VIP neurons ( $n = 15$ ) for cross surround (90° offset) stimuli. Bottom: average PPC spectra for L2/3 FS cells with (red) and without (black) suppression of VIP neurons ( $n = 9$ ) for iso surround (0° offset) stimuli.

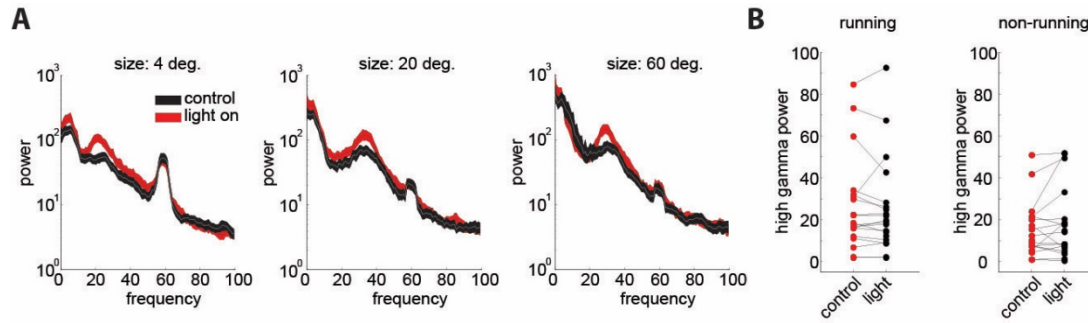

338

339 **Figure S7. Effects of VIP inactivation on higher-frequency, narrowband, thalamic gamma (60Hz).** A: Spectra for different size  
340 grating stimuli with (red) and without (black) inactivation of VIP neurons. VIP affects the visually induced 30Hz gamma band, but  
341 not the thalamically relayed 60Hz gamma band that is suppressed by large/high contrast stimuli. B: Plot comparing the LFP high  
342 gamma band power for blank stimuli in the running condition for control (black) and light (red) trials (n = 19, p = 0.33, Wilcoxon  
343 signed rank test) Right: Plot comparing the LFP high gamma band power for blank stimuli in the non-running condition for control  
344 (black) and light (red) trials (n = 18, p = 0.25, Wilcoxon signed rank test).

345

346

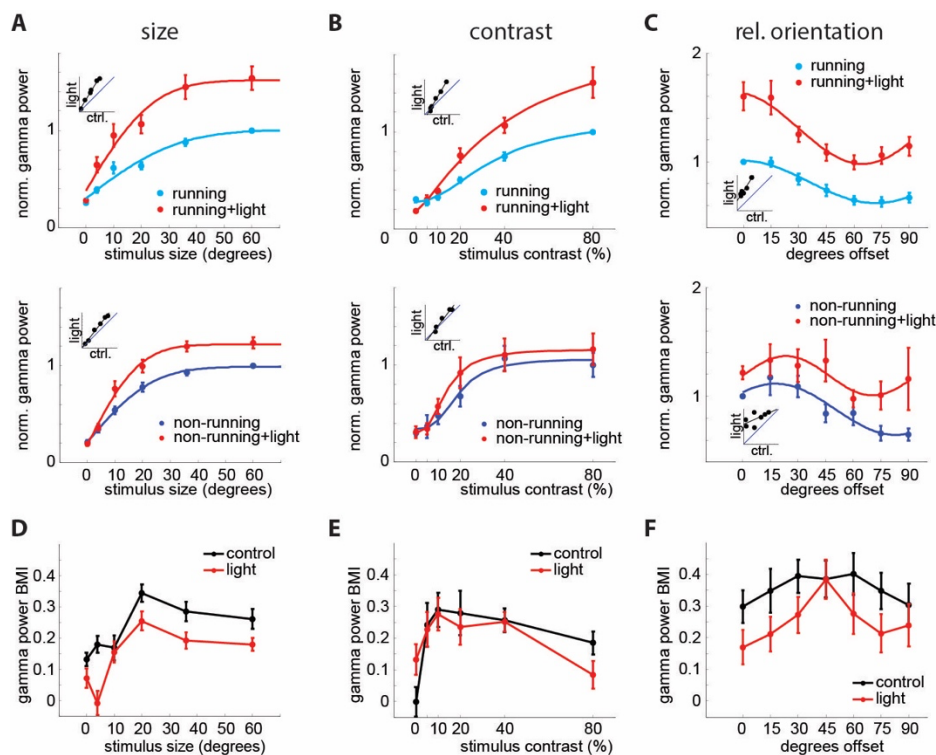

347

**Figure S8: VIP neurons contribute to the behavioral dependence of gamma band synchronization.** **A:** Top: Average normalized gamma power as a function of stimulus size with (red) and without optogenetic suppression of VIP neurons during running (light blue,  $n = 21$ , 2-way ANOVA: main effect of light:  $F(1,160) = 54.18$ ,  $p < 0.001$ ; main effect of size:  $F(4,160) = 22.18$ ,  $p < 0.001$ ; interaction:  $F(4,160) = 1.03$ ,  $p = 0.39$ ) Bottom: Same for non-running (dark blue,  $n = 21$ , 2-way-ANOVA: main effect of light:  $F(1,130) = 26.49$ ,  $p < 0.001$ ; main effect of size:  $F(4,130) = 55.9$ ,  $p < 0.001$ ; interaction:  $F(4,130) = 1.41$ ,  $p = 0.23$ ). **B:** Top: Average normalized gamma power as a function of stimulus contrast with (red) and without optogenetic suppression of VIP neurons during running (light blue,  $n = 21$ , 2-way ANOVA: main effect of light:  $F(1,170) = 27.81$ ,  $p < 0.001$ ; main effect of contrast:  $F(4,170) = 65.08$ ,  $p < 0.001$ ; interaction:  $F(4,170) = 3.85$ ,  $p = 0.005$ ) Bottom: Same for non-running (dark blue,  $n = 21$ , 2-way-ANOVA: main effect of light:  $F(1,125) = 1.48$ ,  $p = 0.23$ ; main effect of contrast:  $F(4,125) = 12.36$ ,  $p < 0.001$ ; interaction:  $F(4,125) = 0.31$ ,  $p = 0.87$ ). **C:** Top: Average normalized gamma power as a function of relative surround angle with (red) and without optogenetic suppression of VIP neurons during running (light blue,  $n = 10$ , 2-way ANOVA: main effect of light:  $F(1,125) = 119.37$ ,  $p < 0.001$ ; main effect of orientation:  $F(6,125) = 13.14$ ,  $p < 0.001$ ; interaction:  $F(6,125) = 0.88$ ,  $p = 0.51$ ) Bottom: Same for non-running (dark blue,  $n = 7$ , 2-way-ANOVA: main effect of light:  $F(1,83) = 11.27$ ,  $p = 0.001$ ; main effect of orientation:  $F(6,83) = 1.9$ ,  $p = 0.09$ ; interaction:  $F(6,83) = 0.47$ ,  $p = 0.83$ ). **D:** Average gamma power BMI (behavioral modulation index) as a function of stimulus size with (red) and without (black) optogenetic suppression of VIP neurons ( $n = 21$ , 2-way-ANOVA: main effect of light:  $F(1,134) = 14.34$ ,  $p < 0.001$ ; main effect of size:  $F(4,134) = 8.84$ ,  $p < 0.001$ ; interaction:  $F(4,134) = 1.29$ ,  $p = 0.28$ ). **E:** Average gamma power BMI as a function of stimulus contrast with (red) and without (black) optogenetic suppression of VIP neurons ( $n = 21$ , 2-way-ANOVA: main effect of light:  $F(1,130) = 0.66$ ,  $p = 0.42$ ; main effect of contrast:  $F(4,130) = 1.79$ ,  $p = 0.14$ ; interaction:  $F(4,130) = 0.22$ ,  $p = 0.93$ ). **F:** Average gamma power BMI as a function of relative surround angle with (red) and without (black) optogenetic suppression of VIP neurons ( $n = 10$ , 2-way-ANOVA: main effect of light:  $F(1,92) = 7.44$ ,  $p = 0.008$ ; main effect of orientation:  $F(6,92) = 1.03$ ,  $p = 0.41$ ; interaction:  $F(6,92) = 0.96$ ).

348

349

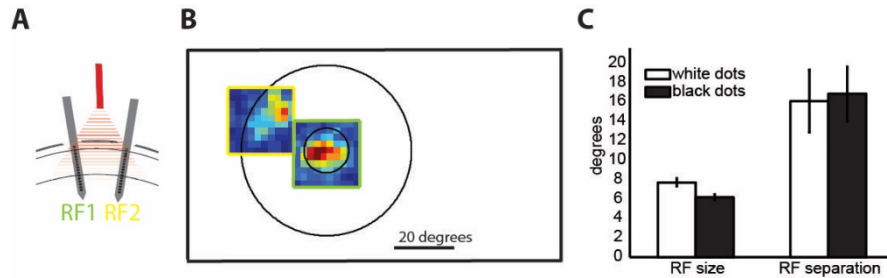

350

351 **Figure S9. Receptive field mapping procedure for coherence measurement.** **A:** Schematic of the multi-electrode array recording  
352 configuration with two laminar arrays in distant sites (530+90  $\mu\text{m}$  apart, histology from  $n = 7$  mice) corresponding to two separate  
353 retinotopic locations (RF1 (green) and RF2 (yellow),  $15^\circ \pm 3^\circ$  of visual angle separation,  $n = 11$  mice). Red triangle denotes wide  
354 illumination with optogenetic light delivered from a fiber located above the two recording sites. **B:** Two sparse noise mapped RFs  
355 (redder colors denote higher firing rates), one from electrode 1 (green frame), one from electrode 2 (yellow frame) superimposed  
356 on the outline of the center and surround of the visual stimulus used for the coherence analysis (Figure 7). Large outer frame is  
357 approximately the size of the stimulation monitor. **C:** average RF size (2 standard deviations of Gaussian fit to RF) and average  
358 separation of center and surround fields, separately for fields mapped with white and black sparse noise,  $n = 8$ .

359

360

## 361 **Materials and Methods**

### 362 *Transgenic mice*

363 All experiments were performed in accordance with the guidelines and regulations of the ACUC of the  
364 University of California, Berkeley. Mice for the *in vivo* experiments were housed in groups of five or less  
365 with a 12:12h light:dark cycle. Both female and male mice were used. Experiments *in vivo* were performed  
366 on animals aged between 8–27 weeks during their subjective night. We used VIP-IRES-Cre (JAX stock  
367 010908) mice. Mice were out-crossed for one generation to the ICR white strain (Charles River).

### 368 *Viral infection*

369 Neonatal VIP-Cre mice (P3–6) were briefly cryo-anesthetized and placed in a head mold. Transcranial  
370 injection of ~45nl of undiluted AAV9-EF1a-DIO-eNpHR3.0-YFP (22 animals) was performed using a  
371 Drummond Nanoject injector at three locations in V1 using a glass pipette beveled to fine tip (~30-60µm).  
372 With respect to the lambda suture coordinates for V1 were 0.0 mm AP, 2.2 mm L and injection was as  
373 superficial as possible under the skull.

### 374 *Preparation for in vivo recording*

375 Mice were anesthetized with isoflurane (2.5% vapor concentration). The scalp was removed, the fascia  
376 retracted, and the skull lightly etched with a 27 gauge needle. Following application of Vetbond to the  
377 skull surface, a custom stainless steel headplate was fixed to the skull with dental cement (Metabond).  
378 Mice were allowed to recover from surgery for at least 2 days. Then mice were habituated for 2–10 days  
379 to head-fixation on a free-spinning circular treadmill. On the day of recording mice were briefly  
380 anesthetized with isoflurane (2%), the skull over V1 was thinned, and one or two (spacing 400-1000µm)  
381 small (<250 µm) craniotomies were opened over V1 with a fine needle

### 382 *Visual stimulation*

383 Visual stimuli were generated with Psychophysics Toolbox (Brainard, 1997) running on an Apple Mac Mini  
384 and were presented on a gamma corrected 23-inch Eizo FORIS FS2333 LCD display with a 60-Hz refresh  
385 rate. At the beginning of each recording session the receptive fields of MUA recorded at each cortical  
386 location was mapped with sparse noise to be able to precisely position the grating stimuli. The stimulus  
387 was centered on a location where a small grating, movable by hand, elicited a clear response. Sparse noise  
388 consisted of black and white squares (2 visual degrees, 80 ms) on a 20x20 visual degree grid flashed onto  
389 a gray background of intermediate luminance. To improve receptive field estimation the same stimulus  
390 grid was offset by 1 degree and the resulting maps were averaged. MUA average receptive fields were  
391 calculated by reverse correlation.

392 Visual stimuli consisted of drifting square-wave gratings at 0.04 cycles per degree and 2 cycles per second  
393 centered on the average MUA receptive field presented for 2s with at least 1s inter stimulus interval.  
394 Gratings were presented in three different configurations: 1) full contrast gratings of eight different  
395 directions (0–315° in steps of 45°) and five different sizes (4, 10, 20, 36, and, if possible, 60 visual degrees  
396 – if the RF was not perfectly centered on the monitor, the effective largest size was slightly smaller); 2)  
397 gratings of four different directions (0-270° in steps of 90°), three different sizes (8, 20 and 60°) and 5  
398 different contrast levels (0.05, 0.1, 0.2, 0.4, 0.8) Michelson contrast and 3) full contrast square-wave  
399 gratings with a circular aperture of 8-15° visual degrees diameter (depending on the separation of the two  
400 RFs), centered on the MUA receptive field of one of the two simultaneously recorded cortical locations,  
401 that was surrounded by a 60 degree grating with one of seven different relative orientations (0-180° in

402 steps of 30°). For the coherence analysis we only analyzed cases in which the second receptive field was  
403 covered entirely and exclusively by the surround-stimulus (see Fig. 7A and sup. Fig. 2).

#### 404 *Optogenetic stimulation in vivo*

405 For optogenetic stimulation of eNpHR3.0 in vivo we used red (center wavelength: 625 nm) from the end  
406 of a 1-mm diameter multimode optical fiber coupled to a fiber coupled LED (Thorlabs) controlled by digital  
407 outputs (NI PCIe-6353). The fiber was placed as close to the craniotomy as possible (<3 mm). The  
408 illumination area was set to illuminate a wide area including all of V1. Light levels were tested in increasing  
409 intensities at the beginning of the experiment and were kept at the lowest possible level that still evoked  
410 observable change in ongoing activity for the remainder of the recording. We only used viral injections  
411 into V1, and did not attempt to use an eNpHR transgenic reporter line to avoid off-target expression of  
412 the opsin and non-specific optogenetic suppression of subcortical nuclei (such as the thalamic reticular  
413 nucleus).

414 Gratings drifted for 2s with at least 1s inter-trial intervals with the red LED switched on for 1 s starting 0.5  
415 s after start of the visual stimulus in 50% of the trials. The period of light was chosen to influence the  
416 stable steady-state of the response to the grating and all analysis was performed during this time window.

#### 417 *In vivo extracellular multi-electrode electrophysiology*

418 One or two 16-channel linear electrodes with 25 micron spacing (NeuroNexus, A1x16-5mm-25-177-A16)  
419 were guided into the brain using micromanipulators (Sensapex) and a stereomicroscope (Leica). Electrical  
420 activity was amplified and digitized at 30 kHz (Spike Gadgets), and stored on a computer hard drive. The  
421 cortical depth of each electrical contact was determined by zeroing the bottom contact to the surface of  
422 the brain. Electrodes were inserted close to perpendicular to the brain's surface for single electrode  
423 recordings and ~25 degrees from vertical for the two electrode experiments. After each recording a  
424 laminar probe coated with the lipophilic dye Dil was used to mark each electrode track to quantitatively  
425 assess insertion angle and depth with post-hoc histologic reconstructions. The laminar depth of recorded  
426 units was corrected for the insertion angle and the local curvature of the neocortex.

#### 427 *Analysis of local field potential data*

428 All analysis was performed using custom written code or openly available packages in Matlab  
429 (Mathworks). Local field potentials were extracted by low pass filtering the raw signal, sampled at 30 kHz,  
430 below 200 Hz and subsequent down-sampling to 1 kHz. For LFP-only analysis we always analyzed the LFP  
431 from the electrode contact closest to a cortical depth of ~350  $\mu$ m (in cortical layer 3). For spike locking to  
432 the LFP we used the LFP from an electrode contact 50  $\mu$ m away from the contact with the largest spike-  
433 waveform amplitude to reduce contamination of the LFP.

434 The power spectrum was computed in a 800 ms analysis window starting 200 ms after light onset (to  
435 exclude any photo-electric artifacts sometimes present in the first ~150 ms after light onset) using multi-  
436 taper estimation in Matlab with the Chronux package (<http://chronux.org/>, Mitra & Bokil, 2007) using 3  
437 tapers. All power analysis was performed on the power at the peak of each animal's specific gamma  
438 oscillation in the specific visual stimulation condition. Peaks were identified as local maxima on the  
439 smoothed spectrum between 20 and 40Hz that were preceded by local minima in the 15Hz preceding the  
440 peak. If no true peak could be found (as was often the case for very small or low contrast conditions), we  
441 took the power at the frequency of the peak for the highest contrast/largest stimulus of that animal.

442 For calculation of coherence, bipolar derivatives of the LFP were calculated by subtracting the electrode  
443 channel two contacts above the channel of interest (50 $\mu$ m distance), to remove the common recording

444 reference and to enhance spatial specificity of the signal. Coherence between the two recording sites was  
445 determined using the chronux package with the same number of tapers as the power analysis. All spectral  
446 plots show mean $\pm$ s.e.m, the coherence spectra show jack-knifed 95% confidence intervals. Coherence  
447 values for the analysis were taken of the peak of each animals' individual coherence spectrum as for the  
448 power above.

#### 449 *Analysis of spiking data*

450 Spiking activity was extracted by filtering the raw signal between 800 and 7000 Hz. Spike detection was  
451 performed using the UltraMega Sort package (Hill et al., 2011). Detected spike waveforms were sorted  
452 using the MClust package (<http://redishlab.neuroscience.umn.edu/MClust/MClust.html>). Waveforms  
453 were first clustered automatically using KlustaKwik and then manually corrected to meet criteria for  
454 further analysis. With the exception of <25 burst firing units, included units had no more than 1.5% of  
455 their individual waveforms violating a refractory period of 2 ms. Individual units were classified as either  
456 fast-spiking or regular spiking using a k-means cluster analysis of spike waveform components. Since the  
457 best separation criterion was the trough-to-peak latency of the large negative going deflection and  
458 clustering is non-deterministic, we defined all units with latencies shorter than 0.36 ms as fast spiking and  
459 all units with latencies larger than 0.38ms as regular spiking. Cells with intermediate latencies were  
460 excluded from further analysis.

461 The depth of each unit was assigned based on the calculated depth of the electrode on the array that  
462 exhibited its largest amplitude sorted waveform. Layer boundaries were determined following a  
463 previously established approach (Pluta *et al.*, 2015). Firing rates were computed from counting spikes in  
464 a 1 second window starting 500 ms after the onset of the visual stimulus, which coincided with the onset  
465 of the LED during optogenetic suppression trials. Unless otherwise stated, we only analyzed trials when  
466 the animal was moving (at least 1cm/s) and not accelerating or decelerating abruptly (not more than 1.5  
467 s.d. deviation from the animal's mean running speed).

468 To quantify locking of spiking activity to the gamma band we bandpass filtered the LFP in a 20 Hz band  
469 around the individual gamma band peak (between 20 and 45 Hz) and extracted the oscillation's  
470 instantaneous phase by using the imaginary part of the analytical signal using the Hilbert transform. Each  
471 spike is thus assigned an exact phase in the gamma oscillation. Phase locking magnitude is determined for  
472 each unit by the pairwise phase consistency (PPC), a measure of synchrony that is not biased by the  
473 number of spikes (Vinck *et al.*, 2010). We only included units that fired more than 20 spikes total in  
474 response to the largest grating size in the control condition and whose average visual response rate was  
475 >1Hz. PPC-spectra were calculated as above but for LFP filtered into 20 non-overlapping 5Hz wide  
476 frequency bands.

477 Behavioral modulation index (BMI) was calculated as  $(R_r - R_s) / (R_r + R_s)$  where  $R_r$  is the average  
478 response during running and  $R_s$  is the average response in non-running (still) trials.

479 For illustrative purposes the average functions for gamma power and PPC were fit with functions. For size  
480 tuning curves an integral of Gaussian, for contrast tuning a Naka-Rushton function and for center-  
481 surround angle a sinusoid was fit with Matlab curve fitting toolbox.

#### 482 *Imaging data*

483 Imaging data was performed as described in (Mossing *et al.*, 2021). Briefly, Sst-IRES-Cre and Vip-IRES-Cre  
484 mice were crossed to Ai162(TIT2L-GC6s-ICL-tTA2)-D mice (RRID:IMSR\_JAX:031562) and an imaging window  
485 implanted. The visual stimulus consisted of square wave drifting gratings, with directions tiling 0-360

486 degrees at 45° intervals, with a spatial frequency of 0.08 cycles per degree, and a temporal frequency of  
487 1 Hz. Visual stimulus presentation lasted one second, followed by a one second inter-stimulus interval.  
488 Mice were head-fixed on a freely spinning running wheel under a Nikon 16x-magnification water  
489 immersion objective and imaged with a two-photon resonant scanning microscope (NeuroLabware) within  
490 a light tight box. The imaging FOV was 430 by 670 μm, with four planes spaced 37.5 μm apart imaged  
491 sequentially using an electro-tunable lens (Optotune), sampling each plane at an effective frame rate of  
492 7.72 Hz. Motion correction and ROI segmentation was performed using Suite2p (Pachitariu *et al.*, 2017).  
493 Neuropil subtraction was applied as described in (Pluta *et al.*, 2017).  $\Delta F/F$  traces were calculated as  $\frac{\Delta F}{F} =$   
494  $\frac{F(t) - F_0}{F_0}$  with baseline  $F_0$  computed over a sliding 20<sup>th</sup> percentile filter of width 3000 frames. Because the  
495 inter-stimulus interval was short to permit more stimuli to be displayed, calcium transients overlapped  
496 between successive trials. Therefore, we deconvolved calcium traces for this data using OASIS with L1  
497 sparsity penalty (Friedrich *et al.*, 2017) using  $\Delta F/F$  traces as input. We report this deconvolved event rate  
498 normalized by the mean.

#### 499 *Mathematical methods*

500 We modeled a network of exponential integrate-and-fire neurons. Simulations were completed using  
501 Euler's method using a timestep of 0.025 msec for a total of 1e6 msec of simulation time. The auto- and  
502 cross-correlation functions were then estimated by binning the spike times over 1 msec time windows,  
503 summing this count across excitatory neurons in a retinotopic location, and then using MATLAB's built-in  
504 `xcorr()` function for a max window length of 250 msec. The power spectrum and cross-spectrum were  
505 then computed by taking the Fourier transform. Additional descriptions of the spiking model, linear  
506 response theory and mean-field model can be found in the Supplemental Methods. The code to reproduce  
507 the key figures from the computational model can be found on GitHub  
508 (<https://github.com/gregoryhandy>).

#### 509 *Acknowledgements*

510 This work was funded by the New York Stem Cell Foundation. H.A. is a New York Stem Cell Foundation  
511 Robertson Investigator. This work was supported by NEI grant R01EY023756 and NINDS grant  
512 U19NS107613. B.D. was supported by NIH grants 1U19NS107613-01 and R01 EB026953, the Vannevar  
513 Bush Faculty Fellowship #N00014-18-1-2002, and a grant from the Simons foundation collaboration on  
514 the global brain. G.H. was supported by The Swartz Foundation.

515



## 516 References

- 517 Adesnik, H., Bruns, W., Taniguchi, H., Huang, Z.J., & Scanziani, M. (2012) A neural circuit for spatial  
518 summation in visual cortex. *Nature*, **490**, 226–231.
- 519 Adrian, E.D. (1950) The electrical activity of the mammalian olfactory bulb. *Electroencephalogr Clin*  
520 *Neurophysiol*, **2**, 377–388.
- 521 Bartoli, E., Bosking, W., Chen, Y., Li, Y., Sheth, S.A., Beauchamp, M.S., Yoshor, D., & Foster, B.L.  
522 (2019) Functionally Distinct Gamma Range Activity Revealed by Stimulus Tuning in Human Visual  
523 Cortex. *Curr Biol*, **29**, 3345-3358.e7.
- 524 Bartos, M., Vida, I., Frotscher, M., Meyer, A., Monyer, H., Geiger, J.R.P., & Jonas, P. (2002) Fast  
525 synaptic inhibition promotes synchronized gamma oscillations in hippocampal interneuron networks.  
526 *Proc Natl Acad Sci U S A*, **99**, 13222–13227.
- 527 Bartos, M., Vida, I., & Jonas, P. (2007) Synaptic mechanisms of synchronized gamma oscillations in  
528 inhibitory interneuron networks. *Nature Reviews Neuroscience*, **8**, 45–56.
- 529 Benda, J., Longtin, A., & Maler, L. (2006) A synchronization-desynchronization code for natural  
530 communication signals. *Neuron*, **52**, 347–358.
- 531 Bos, H., Oswald, A.-M., & Doiron, B. (2020) Untangling stability and gain modulation in cortical circuits  
532 with multiple interneuron classes.
- 533 Bosman, C.A., Schoffelen, J.-M., Brunet, N., Oostenveld, R., Bastos, A.M., Womelsdorf, T., Rubehn, B.,  
534 Stieglitz, T., De Weerd, P., & Fries, P. (2012) Attentional Stimulus Selection through Selective  
535 Synchronization between Monkey Visual Areas. *Neuron*, **75**, 875–888.
- 536 Brainard, D.H. (1997) The Psychophysics Toolbox. *Spat Vis*, **10**, 433–436.
- 537 Bressler, S.L. & Freeman, W.J. (1980) Frequency analysis of olfactory system EEG in cat, rabbit, and rat.  
538 *Electroencephalogr Clin Neurophysiol*, **50**, 19–24.
- 539 Buzsáki, G. & Draguhn, A. (2004) Neuronal oscillations in cortical networks. *Science*, **304**, 1926–1929.
- 540 Buzsáki, G. & Wang, X.-J. (2012) Mechanisms of Gamma Oscillations. *Annual Review of Neuroscience*,  
541 **35**, 203–225.
- 542 Cardin, J.A., Carlén, M., Meletis, K., Knoblich, U., Zhang, F., Deisseroth, K., Tsai, L.-H., & Moore, C.I.  
543 (2009) Driving fast-spiking cells induces gamma rhythm and controls sensory responses. *Nature*, **459**,  
544 663–667.
- 545 Chalk, M., Herrero, J.L., Gieselmann, M.A., Delicato, L.S., Gotthardt, S., & Thiele, A. (2010) Attention  
546 Reduces Stimulus-Driven Gamma Frequency Oscillations and Spike Field Coherence in V1. *Neuron*, **66**,  
547 114–125.
- 548 Chen, G., Zhang, Y., Li, X., Zhao, X., Ye, Q., Lin, Y., Tao, H.W., Rasch, M.J., & Zhang, X. (2017)  
549 Distinct Inhibitory Circuits Orchestrate Cortical beta and gamma Band Oscillations. *Neuron*, **96**, 1403-  
550 1418.e6.
- 551 Colgin, L.L., Denninger, T., Fyhn, M., Hafting, T., Bonnevie, T., Jensen, O., Moser, M.-B., & Moser, E.I.  
552 (2009) Frequency of gamma oscillations routes flow of information in the hippocampus. *Nature*, **462**,  
553 353–357.

- 554 Friedrich, J., Zhou, P., & Paninski, L. (2017) Fast online deconvolution of calcium imaging data. *PLoS*  
555 *Comput Biol*, **13**, e1005423.
- 556 Fries, P. (2009) Neuronal Gamma-Band Synchronization as a Fundamental Process in Cortical  
557 Computation. *Annual Review of Neuroscience*, **32**, 209–224.
- 558 Fries, P. (2015) Rhythms for Cognition: Communication through Coherence. *Neuron*, **88**, 220–235.
- 559 Fries, P., Reynolds, J.H., Rorie, A.E., & Desimone, R. (2001) Modulation of oscillatory neuronal  
560 synchronization by selective visual attention. *Science*, **291**, 1560–1563.
- 561 Fu, Y., Tucciarone, J.M., Espinosa, J.S., Sheng, N., Darcy, D.P., Nicoll, R.A., Huang, Z.J., & Stryker,  
562 M.P. (2014) A Cortical Circuit for Gain Control by Behavioral State. *Cell*, **156**, 1139–1152.
- 563 Gieselmann, M.A. & Thiele, A. (2008) Comparison of spatial integration and surround suppression  
564 characteristics in spiking activity and the local field potential in macaque V1. *European Journal of*  
565 *Neuroscience*, **28**, 447–459.
- 566 Gray, C. & Singer, W. (1989) Stimulus-specific neuronal oscillations in orientation columns of cat visual  
567 cortex. *Proceedings of the National Academy of Sciences*, **86**, 1698–1702.
- 568 Gray, C.M., Koenig, P., Engel, A.K., & Singer, W. (1989) Oscillatory responses in cat visual cortex  
569 exhibit inter-columnar synchronization which reflects global stimulus properties. *Nature*, **338**, 334–337.
- 570 Hakim, R., Shamardani, K., & Adesnik, H. (2018) A neural circuit for gamma-band coherence across the  
571 retinotopic map in mouse visual cortex. *eLife*, **7**.
- 572 Hasenstaub, A., Otte, S., & Callaway, E. (2016) Cell Type-Specific Control of Spike Timing by Gamma-  
573 Band Oscillatory Inhibition. *Cereb Cortex*, **26**, 797–806.
- 574 Hasenstaub, A., Shu, Y., Haider, B., Kraushaar, U., Duque, A., & McCormick, D.A. (2005) Inhibitory  
575 Postsynaptic Potentials Carry Synchronized Frequency Information in Active Cortical Networks. *Neuron*,  
576 **47**, 423–435.
- 577 Hermes, D., Miller, K.J., Wandell, B.A., & Winawer, J. (2015) Stimulus Dependence of Gamma  
578 Oscillations in Human Visual Cortex. *Cereb Cortex*, **25**, 2951–2959.
- 579 Hoseini, M.S., Higashikubo, B., Cho, F.S., Chang, A.H., Clemente-Perez, A., Lew, I., Ciesielska, A.,  
580 Stryker, M.P., & Paz, J.T. (2021) Gamma rhythms and visual information in mouse V1 specifically  
581 modulated by somatostatin+ neurons in reticular thalamus. *Elife*, **10**.
- 582 Jackson, J., Ayzenshtat, I., Karnani, M.M., & Yuste, R. (2016) VIP+ interneurons control neocortical  
583 activity across brain states. *J Neurophysiol*, **115**, 3008–3017.
- 584 Jasper, H. & Penfield, W. (1949) Electrocorticograms in man: Effect of voluntary movement upon the  
585 electrical activity of the precentral gyrus. *Arch. F. Psychiatr. U. Z. Neur.*, **183**, 163–174.
- 586 Karnani, M.M., Jackson, J., Ayzenshtat, I., Hamzehei Sichani, A., Manoocheri, K., Kim, S., & Yuste, R.  
587 (2016) Opening Holes in the Blanket of Inhibition: Localized Lateral Disinhibition by VIP Interneurons.  
588 *Journal of Neuroscience*, **36**, 3471–3480.
- 589 Karnani, M.M., Jackson, J., Ayzenshtat, I., Tucciarone, J., Manoocheri, K., Snider, W.G., & Yuste, R.  
590 (2016) Cooperative Subnetworks of Molecularly Similar Interneurons in Mouse Neocortex. *Neuron*, **90**,  
591 86–100.

- 592 Keller, A.J., Dipoppa, M., Roth, M.M., Caudill, M.S., Ingrosso, A., Miller, K.D., & Scanziani, M. (2020)  
593 A Disinhibitory Circuit for Contextual Modulation in Primary Visual Cortex. *Neuron*, **108**.
- 594 Lee, S., Kruglikov, I., Huang, Z.J., Fishell, G., & Rudy, B. (2013) A disinhibitory circuit mediates motor  
595 integration in the somatosensory cortex. *Nature Neuroscience*, **16**, 1662–1670.
- 596 Lewis, D.A., Hashimoto, T., & Volk, D.W. (2005) Cortical inhibitory neurons and schizophrenia. *Nat Rev*  
597 *Neurosci*, **6**, 312–324.
- 598 Long, M.A., Jutras, M.J., Connors, B.W., & Burwell, R.D. (2005) Electrical synapses coordinate activity  
599 in the suprachiasmatic nucleus. *Nat Neurosci*, **8**, 61–66.
- 600 Millman, D.J., Ocker, G.K., Caldejon, S., Kato, I., Larkin, J.D., Lee, E.K., Luviano, J., Nayan, C.,  
601 Nguyen, T.V., North, K., Seid, S., White, C., Lecoq, J., Reid, C., Buice, M.A., & de Vries, S.E. (2020)  
602 VIP interneurons in mouse primary visual cortex selectively enhance responses to weak but specific  
603 stimuli. *eLife*, **9**, e55130.
- 604 Mitra, P. & Bokil, H. (2007) *Observed Brain Dynamics*, Observed Brain Dynamics. Oxford University  
605 Press.
- 606 Mossing, D.P., Veit, J., Palmigiano, A., Miller, K.D., & Adesnik, H. (2021) Antagonistic inhibitory  
607 subnetworks control cooperation and competition across cortical space (preprint). BioRxiv.
- 608 Nandy, A., Nassi, J.J., Jadi, M.P., & Reynolds, J. (2019) Optogenetically induced low-frequency  
609 correlations impair perception. *Elife*, **8**.
- 610 Neske, G.T. & Connors, B.W. (2016) Synchronized gamma-frequency inhibition in neocortex depends on  
611 excitatory-inhibitory interactions but not electrical synapses. *J Neurophysiol*, **116**, 351–368.
- 612 Niell, C.M. & Stryker, M.P. (2010) Modulation of Visual Responses by Behavioral State in Mouse Visual  
613 Cortex. *Neuron*, **65**, 472–479.
- 614 Nienborg, H., Hasenstaub, A., Nauhaus, I., Taniguchi, H., Huang, Z.J., & Callaway, E.M. (2013) Contrast  
615 Dependence and Differential Contributions from Somatostatin- and Parvalbumin-Expressing Neurons to  
616 Spatial Integration in Mouse V1. *Journal of Neuroscience*, **33**, 11145–11154.
- 617 Pachitariu, M., Stringer, C., Dipoppa, M., Schröder, S., Rossi, L.F., Dalgleish, H., Carandini, M., &  
618 Harris, K.D. (2017) Suite2p: beyond 10,000 neurons with standard two-photon microscopy. *bioRxiv*,  
619 061507.
- 620 Perrenoud, Q., Pennartz, C.M.A., & Gentet, L.J. (2016) Membrane Potential Dynamics of Spontaneous  
621 and Visually Evoked Gamma Activity in V1 of Awake Mice. *PLOS Biology*, **14**, e1002383.
- 622 Peter, A., Uran, C., Klon-Lipok, J., Roese, R., van Stijn, S., Barnes, W., Dowdall, J.R., Singer, W., Fries,  
623 P., & Vinck, M. (2019) Surface color and predictability determine contextual modulation of V1 firing and  
624 gamma oscillations. *Elife*, **2019**, 38.
- 625 Pfeffer, C.K., Xue, M., He, M., Huang, Z.J., & Scanziani, M. (2013) Inhibition of inhibition in visual  
626 cortex: the logic of connections between molecularly distinct interneurons. *Nature Neuroscience*, **16**,  
627 1068–1076.
- 628 Pi, H.-J., Hangya, B., Kvitsiani, D., Sanders, J.I., Huang, Z.J., & Kepecs, A. (2013) Cortical interneurons  
629 that specialize in disinhibitory control. *Nature*, **503**, 521–524.

- 630 Pluta, S., Naka, A., Veit, J., Telian, G., Yao, L., Hakim, R., Taylor, D., & Adesnik, H. (2015) A direct  
631 translaminar inhibitory circuit tunes cortical output. *Nature Neuroscience*, **18**, 1631–1640.
- 632 Pluta, S.R., Lyall, E.H., Telian, G.I., Ryapolova-Webb, E., & Adesnik, H. (2017) Surround Integration  
633 Organizes a Spatial Map during Active Sensation. *Neuron*, **94**, 1220-1233.e5.
- 634 Ray, S. & Maunsell, J.H.R. (2010) Differences in Gamma Frequencies across Visual Cortex Restrict  
635 Their Possible Use in Computation. *Neuron*, **67**, 885–896.
- 636 Ray, S., Ni, A.M., & Maunsell, J.H.R. (2013) Strength of Gamma Rhythm Depends on Normalization.  
637 *PLoS Biology*, **11**, e1001477.
- 638 Riehle, A., Gruen, S., Diesmann, M., & Aertsen, A. (1997) Spike Synchronization and Rate Modulation  
639 Differentially Involved in Motor Cortical Function. *Science*, **278**, 1950–1953.
- 640 Saleem, A.B., Lien, A.D., Krumin, M., Haider, B., Rosón, M.R., Ayaz, A., Reinhold, K., Busse, L.,  
641 Carandini, M., & Harris, K.D. (2017) Subcortical Source and Modulation of the Narrowband Gamma  
642 Oscillation in Mouse Visual Cortex. *Neuron*, **93**, 315–322.
- 643 Salinas, E. & Sejnowski, T.J. (2001) Correlated neuronal activity and the flow of neural information.  
644 *Nature reviews neuroscience*, **2**, 539–550.
- 645 Schneider, M., Brogini, A.C., Dann, B., Tzanou, A., Uran, C., Sheshadri, S., Scherberger, H., & Vinck,  
646 M. (2021) A mechanism for inter-areal coherence through communication based on connectivity and  
647 oscillatory power. *Neuron*, S0896627321007108.
- 648 Schnitzler, A. & Gross, J. (2005) Normal and pathological oscillatory communication in the brain. *Nature*  
649 *Reviews Neuroscience*, **6**, 285–296.
- 650 Self, M.W., Peters, J.C., Possel, J.K., Reithler, J., Goebel, R., Ris, P., Jeurissen, D., Reddy, L., Claus, S.,  
651 Baayen, J.C., & Roelfsema, P.R. (2016) The Effects of Context and Attention on Spiking Activity in  
652 Human Early Visual Cortex. *PLOS Biology*, **14**, e1002420.
- 653 Sohal, V.S. & Huguenard, J.R. (2005) Inhibitory coupling specifically generates emergent gamma  
654 oscillations in diverse cell types. *Proc Natl Acad Sci U S A*, **102**, 18638–18643.
- 655 Sohal, V.S., Zhang, F., Yizhar, O., & Deisseroth, K. (2009) Parvalbumin neurons and gamma rhythms  
656 enhance cortical circuit performance. *Nature*, **459**, 698–702.
- 657 Storchi, R., Bedford, R.A., Martial, F.P., Allen, A.E., Wynne, J., Montemurro, M.A., Petersen, R.S., &  
658 Lucas, R.J. (2017) Modulation of Fast Narrowband Oscillations in the Mouse Retina and dLGN  
659 According to Background Light Intensity. *Neuron*, **93**, 299–307.
- 660 Traub, R.D., Bibbig, A., LeBeau, F.E.N., Buhl, E.H., & Whittington, M.A. (2004) Cellular mechanisms  
661 of neuronal population oscillations in the hippocampus in vitro. *Annu Rev Neurosci*, **27**, 247–278.
- 662 Traub, R.D., Kopell, N., Bibbig, A., Buhl, E.H., LeBeau, F.E., & Whittington, M.A. (2001) Gap junctions  
663 between interneuron dendrites can enhance synchrony of gamma oscillations in distributed networks. *J*  
664 *Neurosci*, **21**, 9478–9486.
- 665 Tukker, J.J., Fuentealba, P., Hartwich, K., Somogyi, P., & Klausberger, T. (2007) Cell type-specific  
666 tuning of hippocampal interneuron firing during gamma oscillations in vivo. *J Neurosci*, **27**, 8184–8189.
- 667 Uhlhaas, P.J. & Singer, W. (2010) Abnormal neural oscillations and synchrony in schizophrenia. *Nat Rev*

- 668 *Neurosci*, **11**, 100–113.
- 669 Veit, J., Hakim, R., Jadi, M.P., Sejnowski, T.J., & Adesnik, H. (2017) Cortical gamma band  
670 synchronization through somatostatin interneurons. *Nature Neuroscience*, **20**, 951–959.
- 671 Vinck, M., Batista-Brito, R., Knoblich, U., & Cardin, J.A. (2015) Arousal and Locomotion Make Distinct  
672 Contributions to Cortical Activity Patterns and Visual Encoding. *Neuron*, **86**, 740–754.
- 673 Vinck, M., van Wingerden, M., Womelsdorf, T., Fries, P., & Pennartz, C.M.A. (2010) The pairwise phase  
674 consistency: A bias-free measure of rhythmic neuronal synchronization. *NeuroImage*, **51**, 112–122.
- 675 Vinck, M., Womelsdorf, T., Buffalo, E.A., Desimone, R., & Fries, P. (2013) Attentional modulation of  
676 cell-class-specific gamma-band synchronization in awake monkey area v4. *Neuron*, **80**, 1077–1089.
- 677 Womelsdorf, T. & Fries, P. (2006) Neuronal coherence during selective attentional processing and  
678 sensory-motor integration. *J Physiol Paris*, **100**, 182–193.
- 679 Wulff, P., Ponomarenko, A.A., Bartos, M., Korotkova, T.M., Fuchs, E.C., Bähner, F., Both, M., Tort,  
680 A.B.L., Kopell, N.J., Wisden, W., & Monyer, H. (2009) Hippocampal theta rhythm and its coupling with  
681 gamma oscillations require fast inhibition onto parvalbumin-positive interneurons. *Proc Natl Acad Sci U*  
682 *SA*, **106**, 3561–3566.
- 683 Xu, X. & Callaway, E.M. (2009) Laminar Specificity of Functional Input to Distinct Types of Inhibitory  
684 Cortical Neurons. *Journal of Neuroscience*, **29**, 70–85.
- 685 Yizhar, O., Fenno, L.E., Prigge, M., Schneider, F., Davidson, T.J., O’Shea, D.J., Sohal, V.S., Goshen, I.,  
686 Finkelstein, J., Paz, J.T., Stehfest, K., Fudim, R., Ramakrishnan, C., Huguenard, J.R., Hegemann, P., &  
687 Deisseroth, K. (2011) Neocortical excitation/inhibition balance in information processing and social  
688 dysfunction. *Nature*, **477**, 171–178.
- 689 Zhang, S., Xu, M., Kamigaki, T., Hoang Do, J.P., Chang, W.-C., Jenvay, S., Miyamichi, K., Luo, L., &  
690 Dan, Y. (2014) Long-range and local circuits for top-down modulation of visual cortex processing.  
691 *Science*, **345**, 660–665.
- 692 Zhang, Z., Russell, L.E., Packer, A.M., Gauld, O.M., & Häusser, M. (2018) Closed-loop all-optical  
693 interrogation of neural circuits in vivo. *Nat Methods*, **15**, 1037–1040.
- 694
